# Supplementary material for: Single-nucleus transcriptome-wide association study of human brain disorders
Source: bioRxiv or medRxiv preprint supplement (doi:10.1101/2024.11.04.24316495), 2024-11-05
Supplement: Supplementary file [file media-1.pdf]

# SUPPLEMENTARY INFORMATION

## Single-nucleus transcriptome-wide association study of human brain disorders

Authors: Sanan Venkatesh<sup>1-5</sup>, Zhenyi Wu<sup>1-5</sup>, Marios Anyfantakis<sup>1-5</sup>, Christian Dillard<sup>1-4</sup>, Prashant N.M.<sup>1-4</sup>, David Burstein<sup>1-6</sup>, Deepika Mathur<sup>1-6</sup>, Roman Kosoy<sup>1-4</sup>, Christos Chatzinakos<sup>7,8</sup>, Bukola Ajanaku<sup>1-4</sup>, Fotis Tsetsos<sup>1-4,6</sup>, Biao Zeng<sup>1-4</sup>, Aram Hong<sup>1-4</sup>, Clara Casey<sup>1-4</sup>, Marcela Alvia<sup>1-4</sup>, Zhiping Shao<sup>1-4</sup>, Stathis Argyriou<sup>1-4</sup>, Karen Therrien<sup>1-4</sup>, VA Million Veteran Program, PsychAD Consortium, Tim Bigdeli<sup>7-10</sup>, Pavan Auluck<sup>11</sup>, David A. Bennett<sup>12</sup>, Stefano Marengo<sup>11</sup>, Vahram Haroutunian<sup>1-5</sup>, Kiran Girdhar<sup>1-4</sup>, Jaroslav Bendl<sup>1-5</sup>, Donghoon Lee<sup>1-4</sup>, John F. Fullard<sup>1-4</sup>, Gabriel E. Hoffman<sup>1-6</sup>, Georgios Voloudakis<sup>1-6,13\*</sup>, Panos Roussos<sup>1-6\*</sup>

### Affiliations:

<sup>1</sup>Department of Psychiatry, Icahn School of Medicine at Mount Sinai, New York, NY, USA

<sup>2</sup>Center for Disease Neurogenomics, Icahn School of Medicine at Mount Sinai, New York, NY USA

<sup>3</sup>Friedman Brain Institute, Icahn School of Medicine at Mount Sinai, New York, NY, USA

<sup>4</sup>Department of Genetics and Genomic Science, Icahn School of Medicine at Mount Sinai, New York, NY, USA

<sup>5</sup>Mental Illness Research, Education, and Clinical Center (VISN 2 South), James J. Peters VA Medical Center, Bronx, NY, USA

<sup>6</sup>Center for Precision Medicine and Translational Therapeutics, James J. Peters VA Medical Center, Bronx, NY, USA.

<sup>7</sup>Department of Psychiatry and Behavioral Sciences, SUNY Downstate Health Sciences University, Brooklyn, NY, USA

<sup>8</sup>Institute for Genomics in Health (IGH), SUNY Downstate Health Sciences University, Brooklyn, NY, USA

<sup>9</sup>VA New York Harbor Healthcare System, Brooklyn, NY, USA

<sup>10</sup>Department of Epidemiology and Biostatistics, School of Public Health, SUNY Downstate Health Sciences University, Brooklyn, NY, USA

<sup>11</sup>Human Brain Collection Core, National Institute of Mental Health-Intramural Research Program, Bethesda, MD, USA

<sup>12</sup>Rush Alzheimer's Disease Center, Rush University Medical Center.

<sup>13</sup>Department of Artificial Intelligence and Human Health, Icahn School of Medicine at Mount Sinai, New York, NY, USA

\*co-senior and co-corresponding

# TABLE OF CONTENTS

|                                       |           |
|---------------------------------------|-----------|
| <b>TABLE OF CONTENTS</b> .....        | <b>2</b>  |
| <b>SUPPLEMENTARY FIGURES</b> .....    | <b>3</b>  |
| Supplementary Fig. 1.....             | 3         |
| Supplementary Fig. 2.....             | 4         |
| Supplementary Fig. 3.....             | 5         |
| Supplementary Fig. 4.....             | 6         |
| Supplementary Fig. 5.....             | 7         |
| Supplementary Fig. 6.....             | 8         |
| Supplementary Fig. 7.....             | 12        |
| Supplementary Fig. 8.....             | 15        |
| Supplementary Fig. 9.....             | 16        |
| Supplementary Fig. 10.....            | 19        |
| Supplementary Fig. 11.....            | 21        |
| Supplementary Fig. 12.....            | 22        |
| Supplementary Fig. 13.....            | 23        |
| Supplementary Fig. 14.....            | 25        |
| Supplementary Fig. 15.....            | 29        |
| Supplementary Fig. 16.....            | 31        |
| Supplementary Fig. 17.....            | 32        |
| Supplementary Fig. 18.....            | 36        |
| Supplementary Fig. 19.....            | 37        |
| <b>SUPPLEMENTARY NOTES</b> .....      | <b>38</b> |
| Other Acknowledgments.....            | 38        |
| <b>SUPPLEMENTARY REFERENCES</b> ..... | <b>41</b> |

# SUPPLEMENTARY FIGURES

## Supplementary Fig. 1

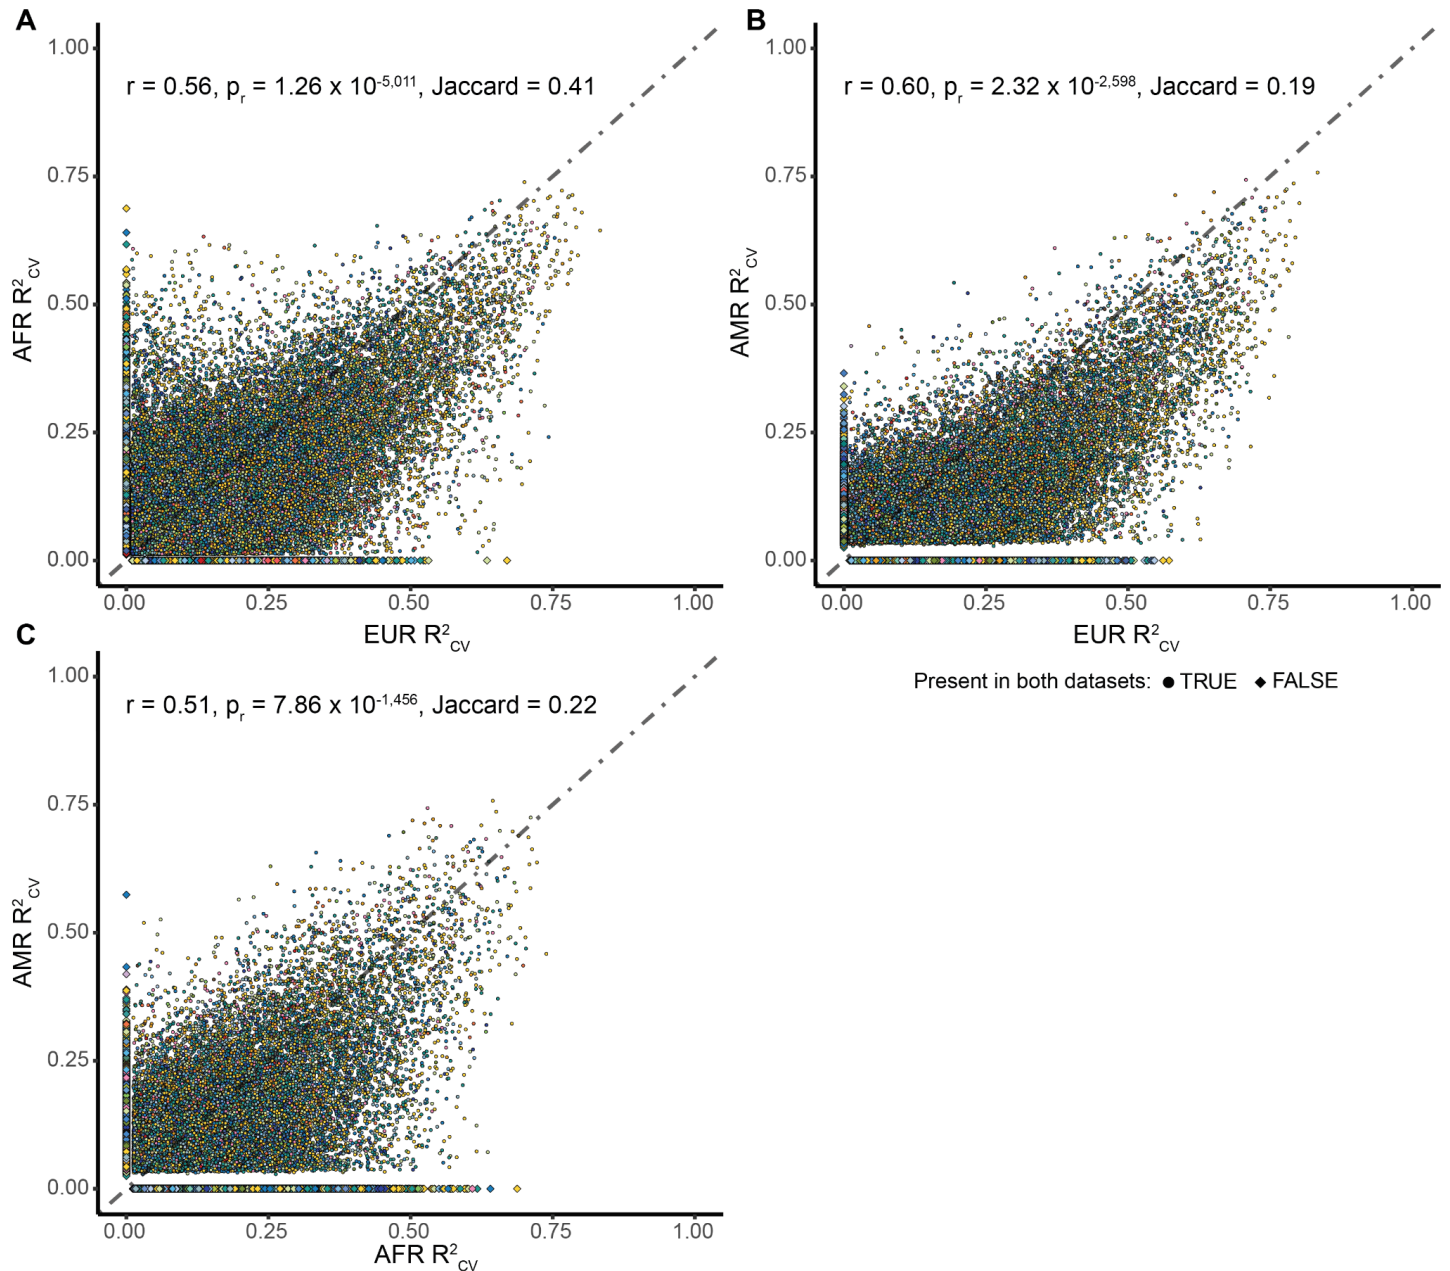

**Supplementary Fig. 1 | Comparison of gene-cell-type prediction performance across ancestry-specific snTIMs.** Color of each point represents the cell-type (see legend). Comparisons are for EUR vs AFR (A), EUR vs AMR (B) and AFR vs AMR (C) snTIMs. **A.** 3,819 genes are imputed in EUR and not AFR snTIMs, and vice versa for 2,378 genes. **B.** 7,824 genes are imputed in EUR and not AMR snTIMs, and vice versa for 1,558 genes. **C.** 6,795 genes are imputed in AFR and not AMR snTIMs, and vice versa for 1,970 genes.  $r$ : Spearman's correlation coefficient.

## Supplementary Fig. 2

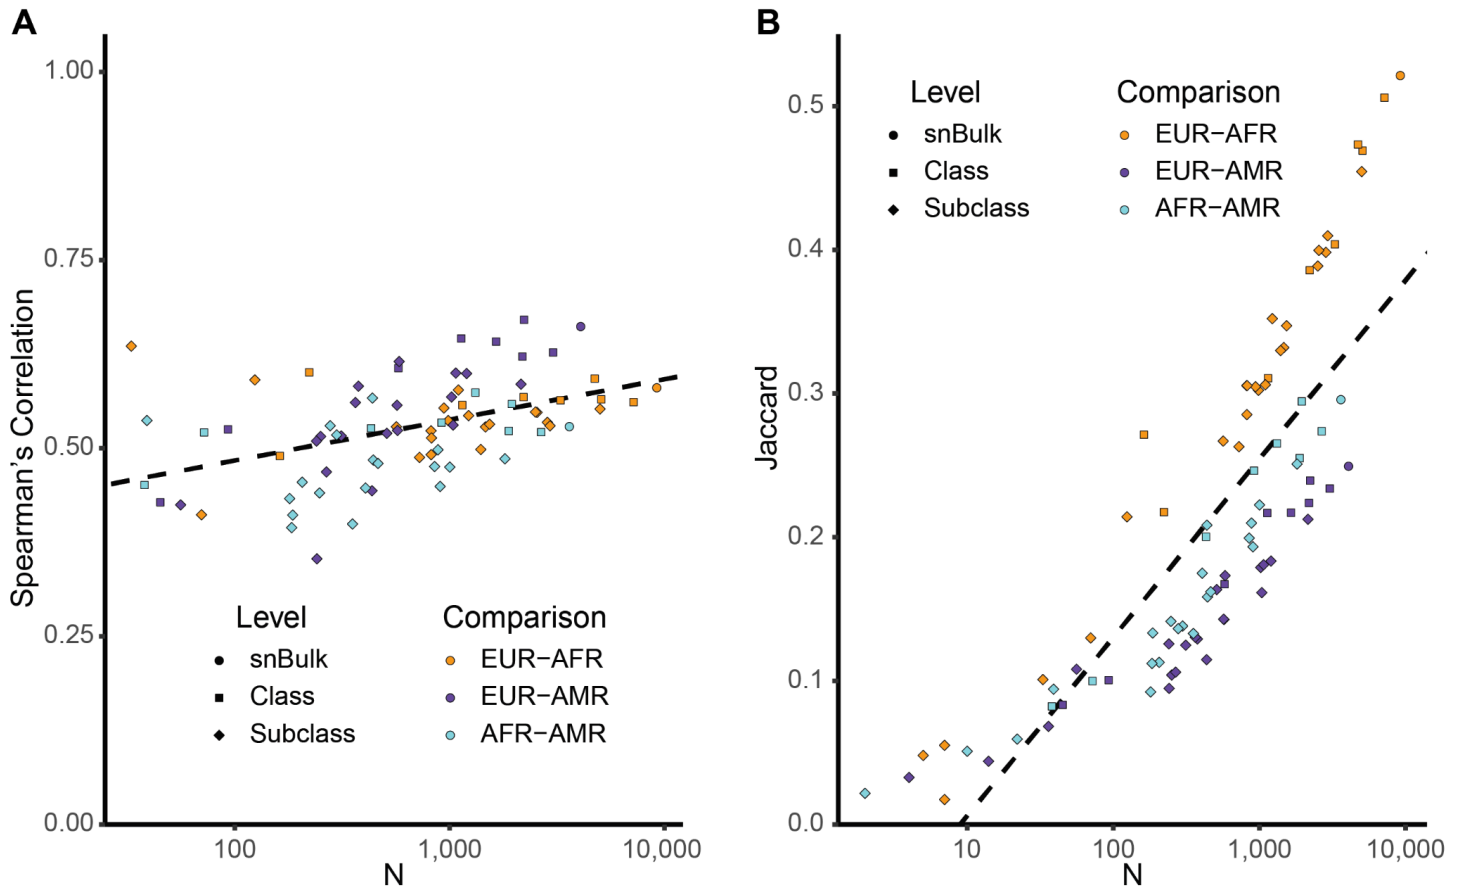

**Supplementary Fig. 2 | Spearman's correlation (A) and Jaccard similarity (B) of cross-ancestry prediction performance at different cell-type levels.** Each point represents a pairwise analysis (Spearman's correlation for A and Jaccard index for B, respectively) of  $R^2_{CV}$  across all shared imputable genes ("N") between ancestries for the same snTIM. Applicable pairwise ancestry comparisons include EUR-AFR, EUR-AMR and AFR-AMR colored orange, purple and light-blue, respectively. Point shape denotes snTIM level including snBulk, Class and Subclass. Dashed lines represent linear regression lines. **A.**  $\log_{10}(N)$  is positively associated ( $p = 1.01 \times 10^{-5}$ ) with Spearman's correlation in the linear regression analysis ( $p = 1.01 \times 10^{-5}$ , adjusted  $R^2 = 0.21$ ). **B.**  $\log_{10}(N)$  is positively associated ( $p = 1.91 \times 10^{-24}$ ) with the Jaccard index in a linear regression model ( $p = 3.81 \times 10^{-24}$ , adjusted  $R^2 = 0.679$ ).

## Supplementary Fig. 3

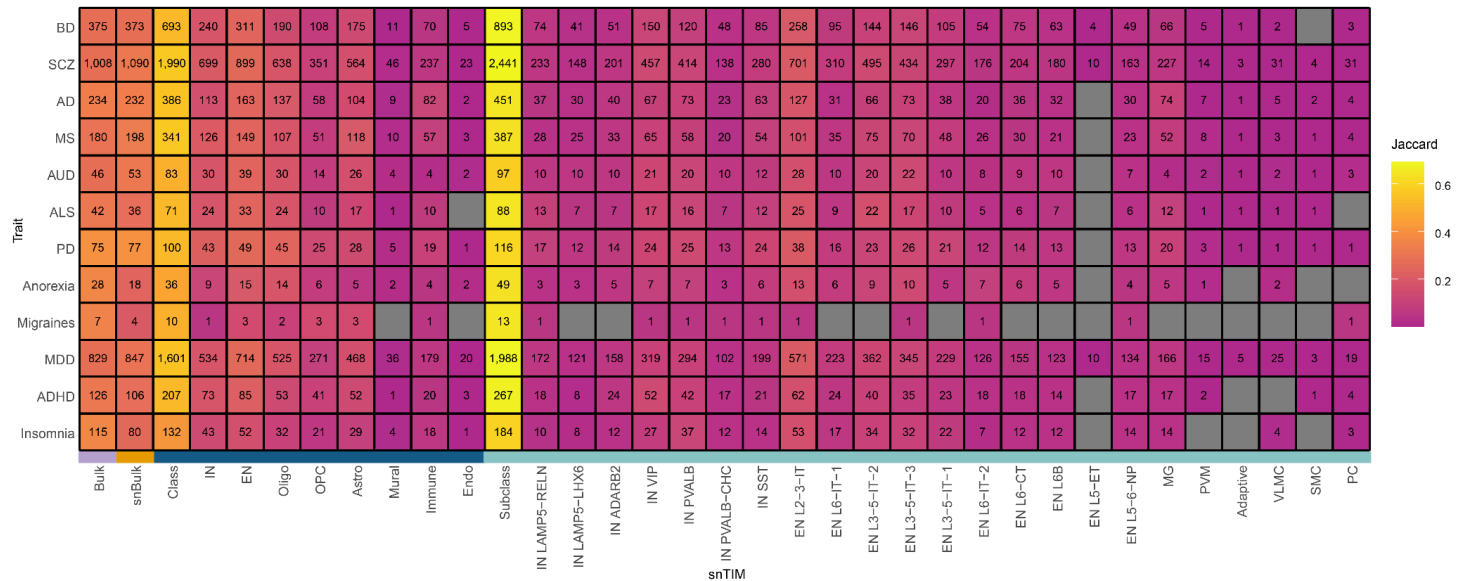

**Supplementary Fig. 3 | Expanded heatmap of S-TWAS significant gene-trait associations by cell-type hierarchy level.** The number within each cell represents the number of FDR<sup>33</sup>-significant gene-trait associations (GTAs) within each snTIM and level aggregate. FDR-correction for class and subclass aggregate categories is performed across all participating models for that hierarchy level. Color denotes the Jaccard index  $\left(\frac{|x \cap all|}{|x \cup all|}\right)$  of the specific cell (x) against the union of all FDR-significant trait-associated genes across Bulk, snBulk, class and subclass. S-TWAS analysis is limited to EUR ancestry.

## Supplementary Fig. 4

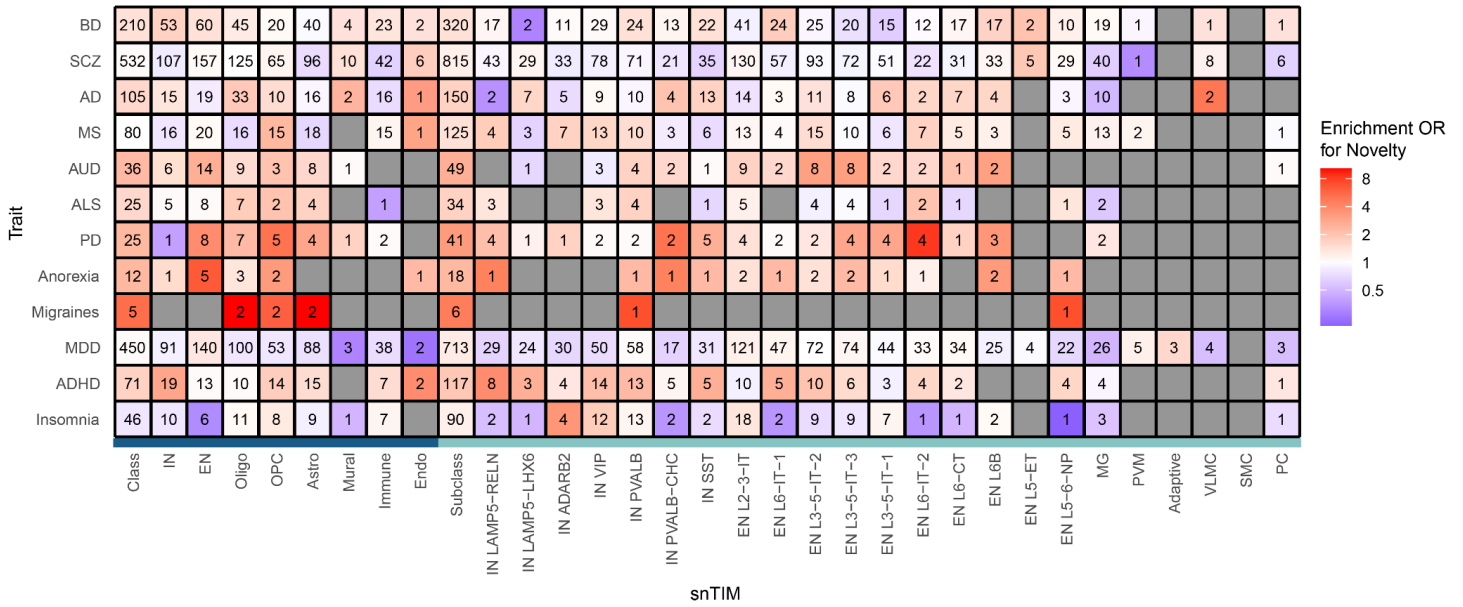

**Supplementary Fig. 4 | Heatmap of novel GTAs.** Number in each cell indicates the number of novel GTAs (as in Fig. 2C) found in each snTIM and level aggregates. Color of each cell indicates the effect size of the fisher's exact test comparing each snTIM to snBulk.

# Supplementary Fig. 5

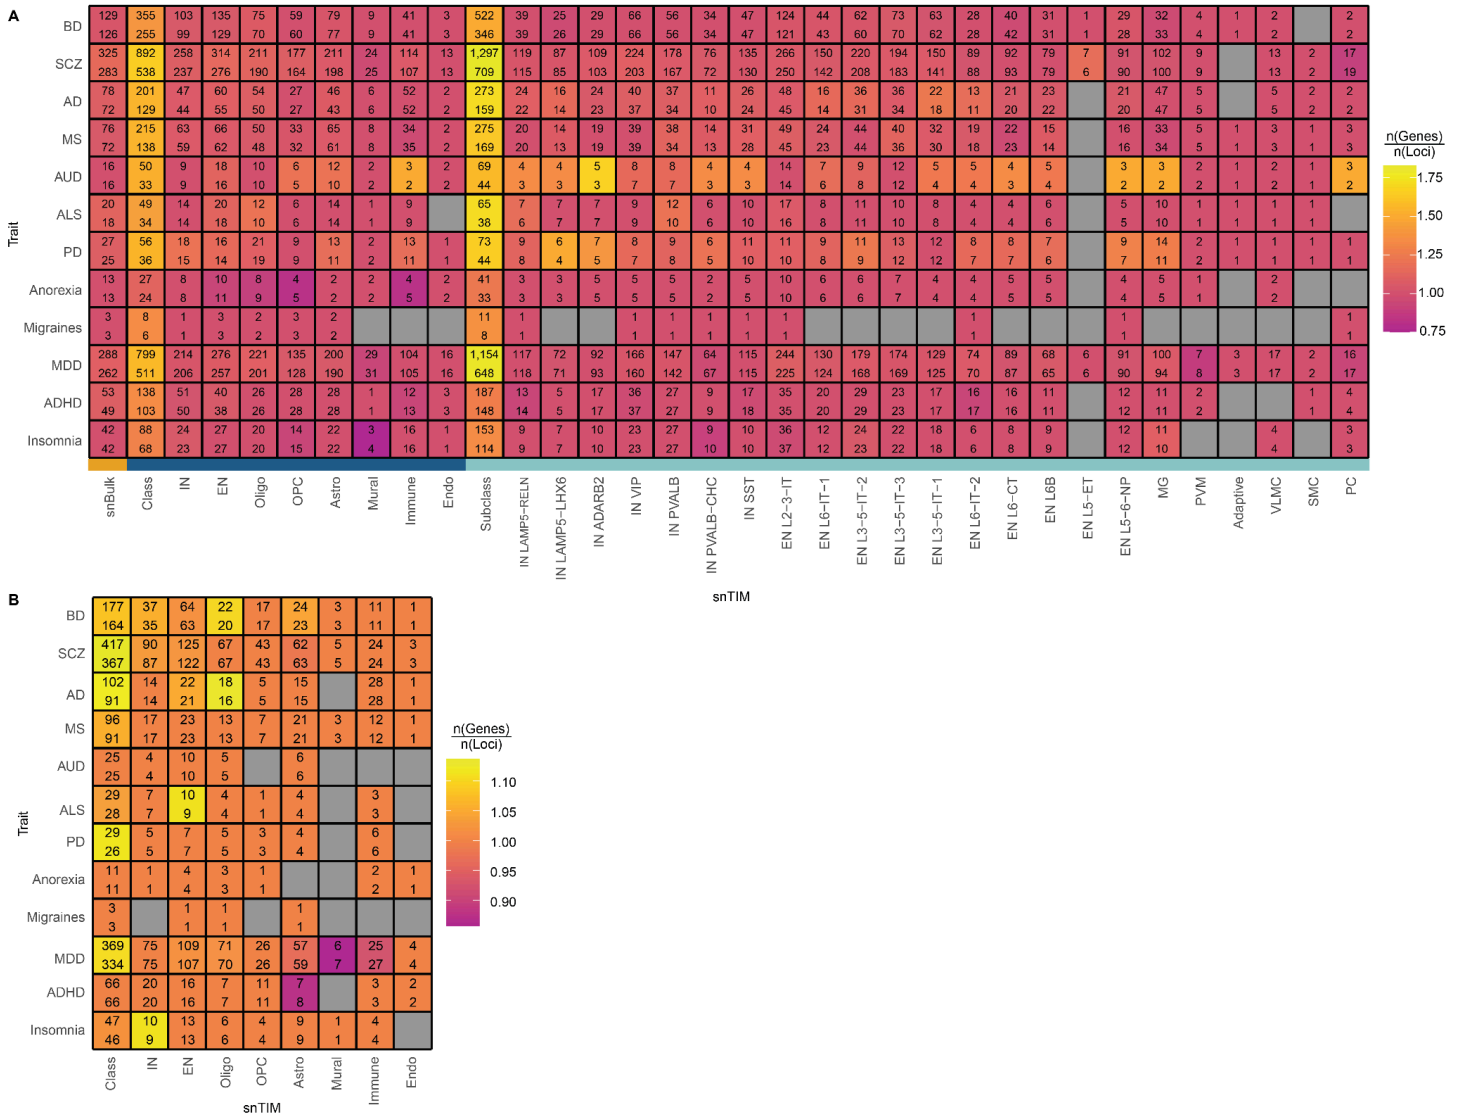

**Supplementary Fig. 5 | Expanded gene fine-mapping heatmaps. A**, Expanded heatmap of S-snTWAS individual-cell-type gene fine-mapping. The numbers at the top and bottom of each cell indicate the count of fine-mapped genes and loci, respectively. Color indicates the genes per locus for every trait-snTIM combination. Fine-mapping was performed with FOCUS for each cell-type. FOCUS performs analyses at the LD block level rather than the standard 1 mega base pair window from the transcription start site which means that dysregulated GReX for a given gene-trait combination may be driven by more than one locus. In our cell-type-specific snTWAS FOCUS analysis, in most loci one gene was fine-mapped (PIP  $\geq$  0.5), with the exception of a few loci prioritizing more than one gene. Interestingly, in a few instances (e.g. MDD PVM), a gene was fine-mapped in two different LD blocks. **B**, Expanded heatmap of S-snTWAS multiple-cell-type gene fine-mapping. The numbers at the top and bottom of each cell indicate the count of fine-mapped genes and loci, respectively. Color indicates the genes per locus for every trait-snTIM combination. Fine-mapping was performed with FOCUS while jointly considering all cell-types at the class level.

# Supplementary Fig. 6

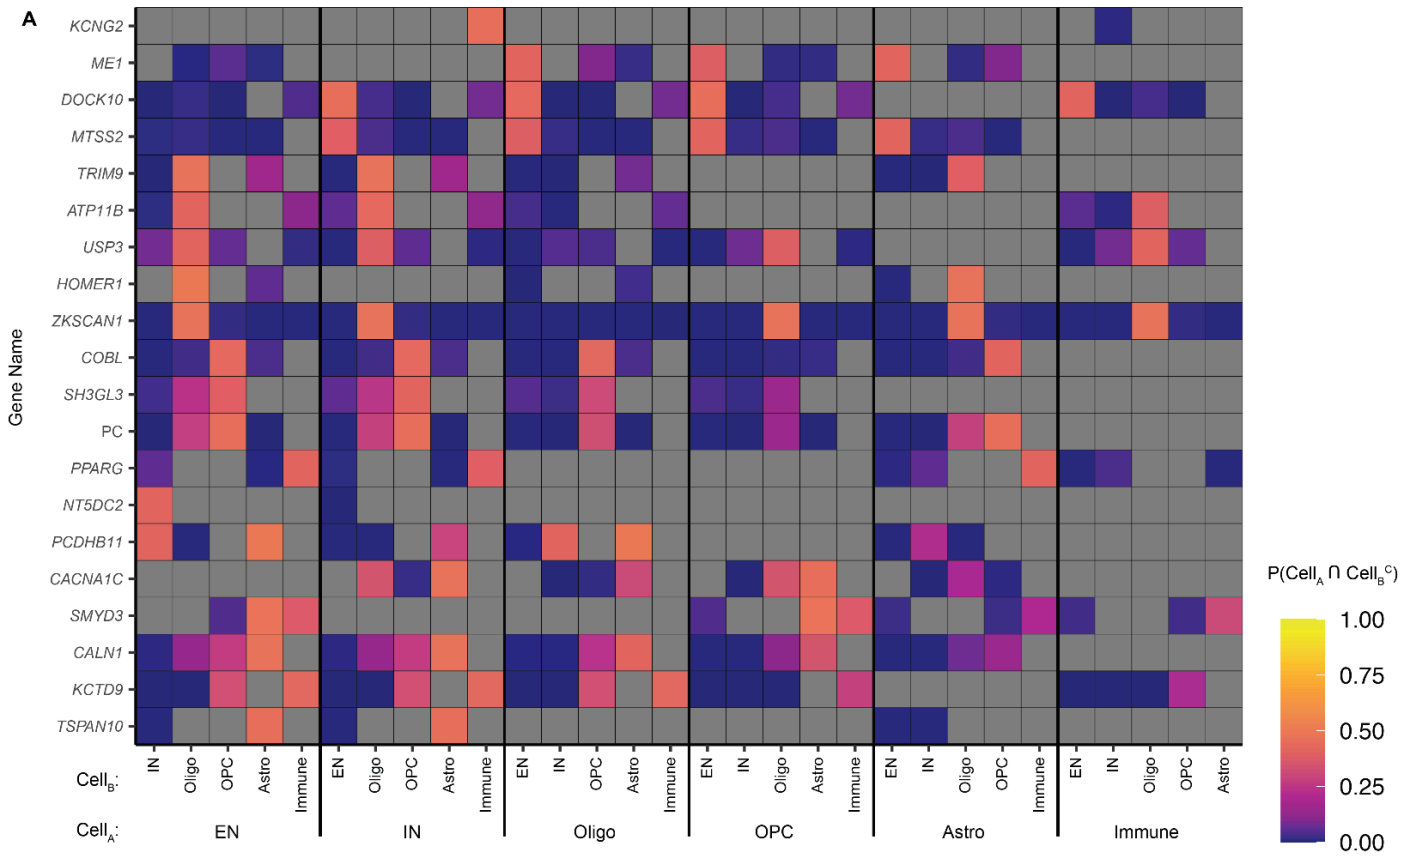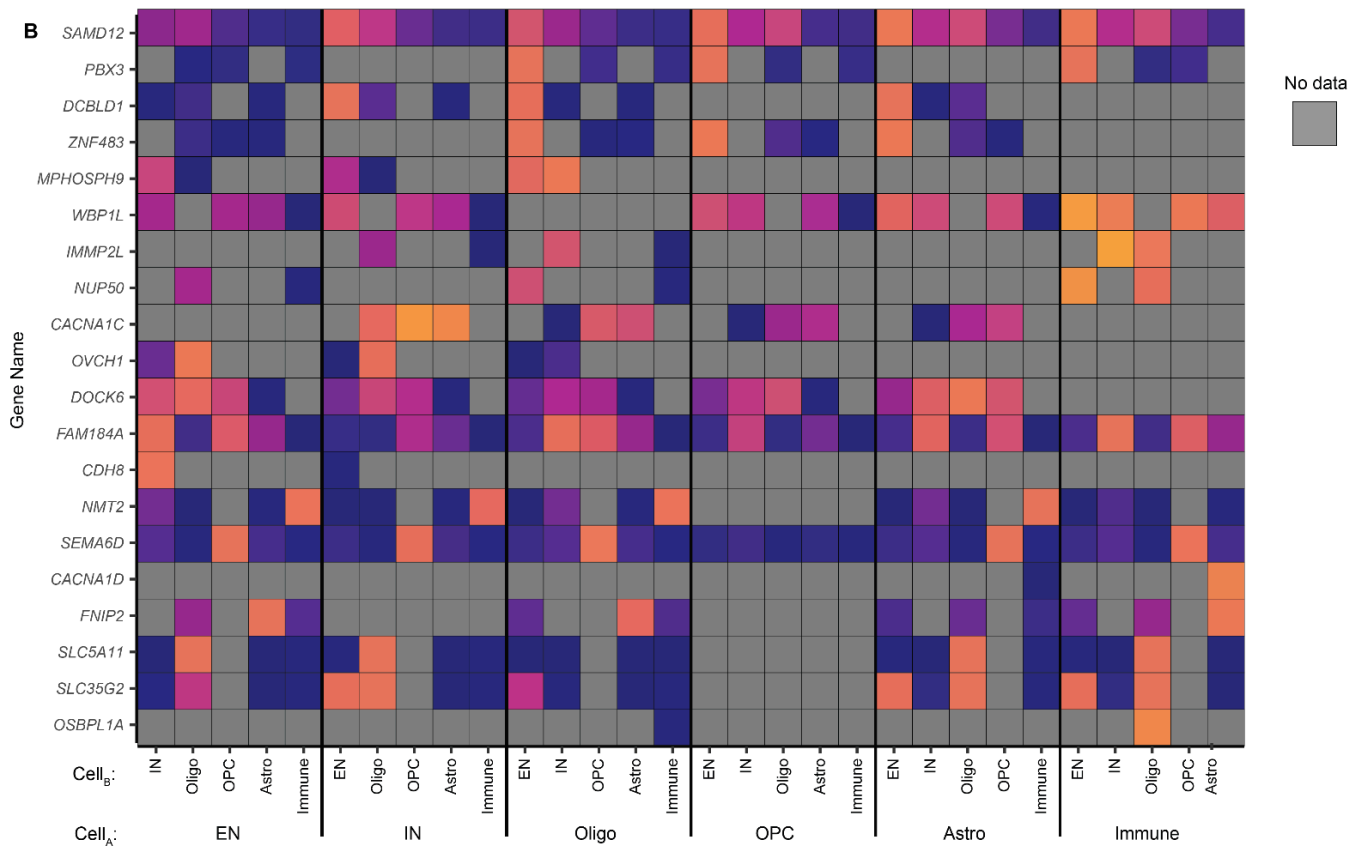



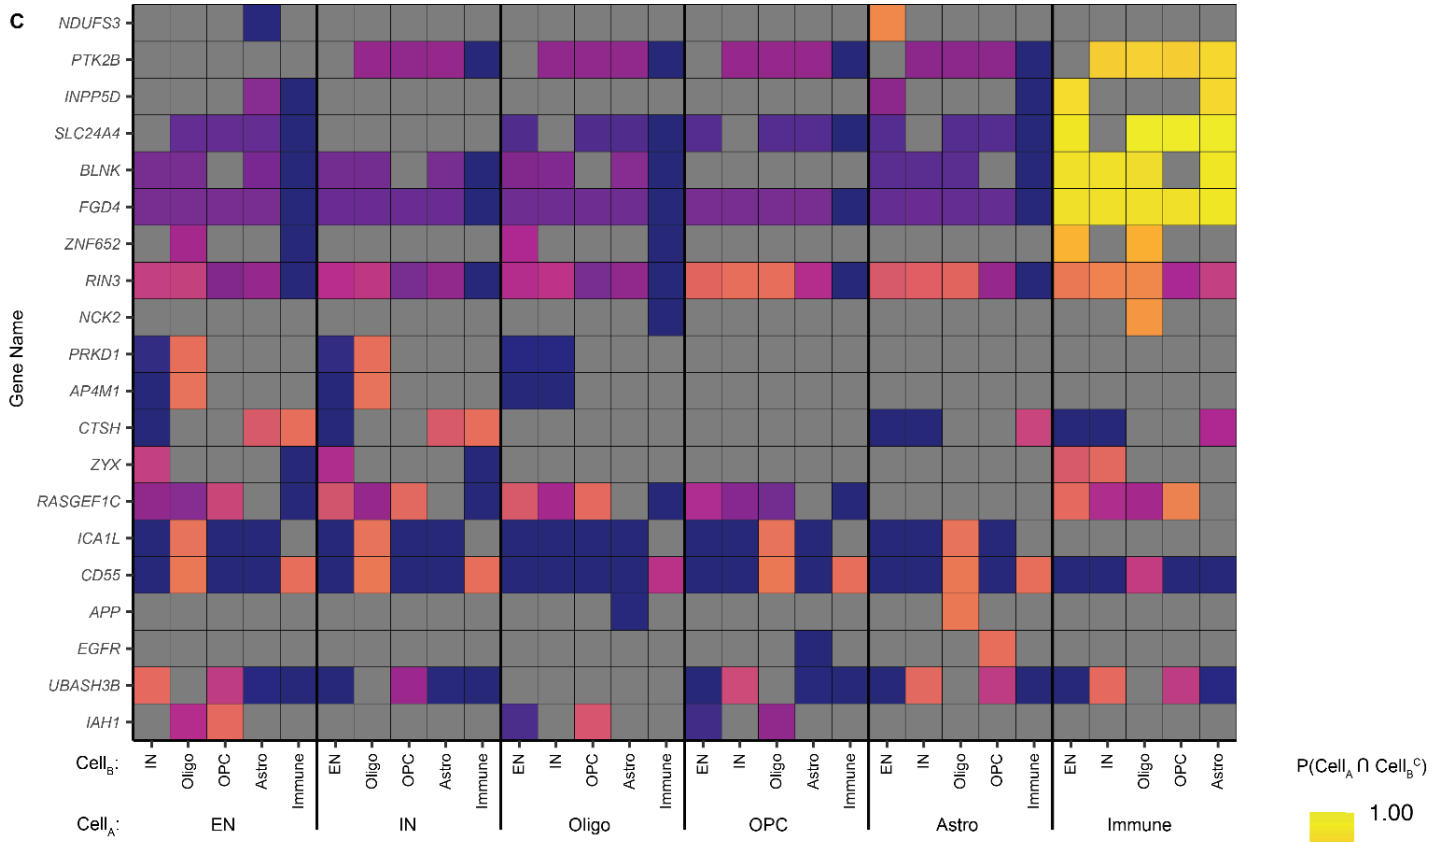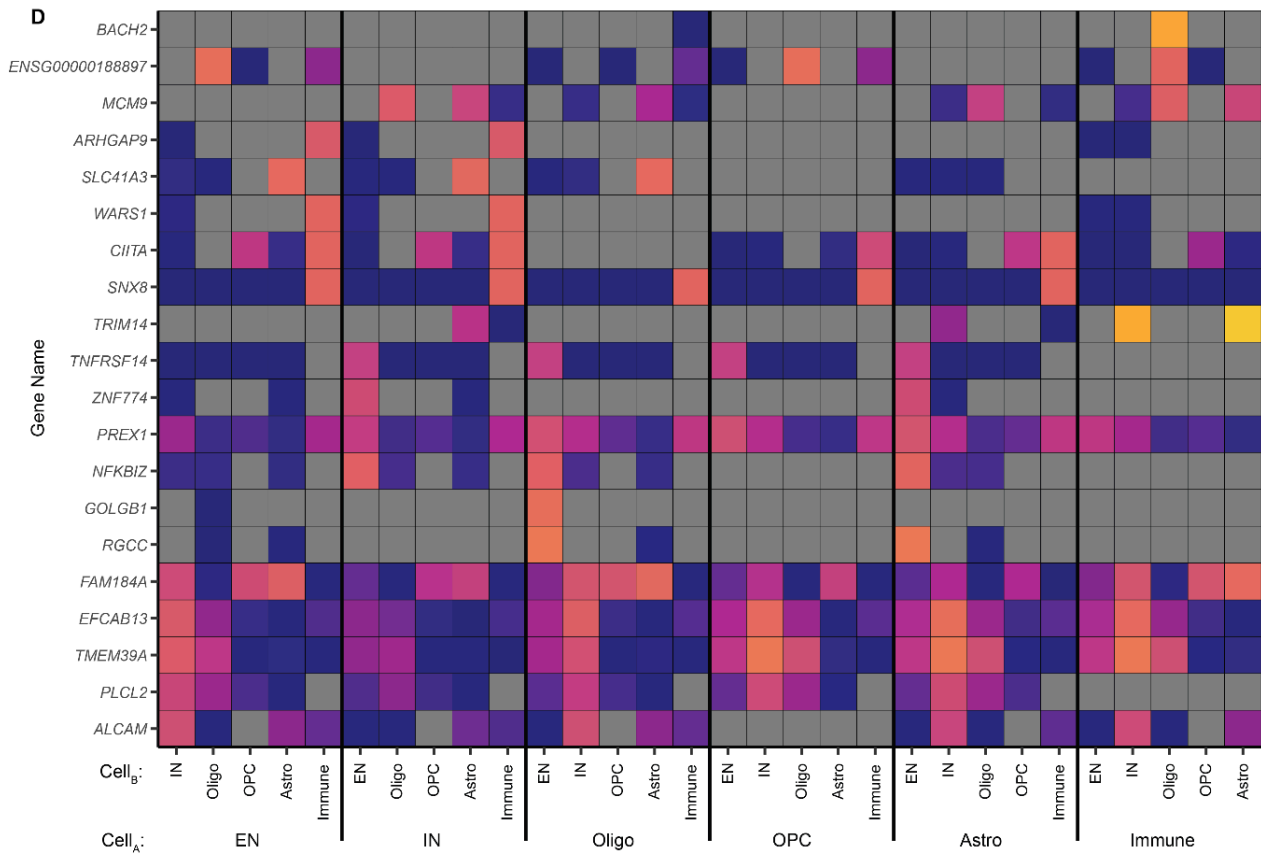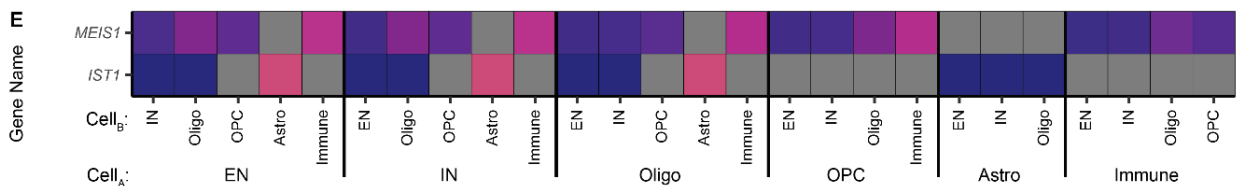

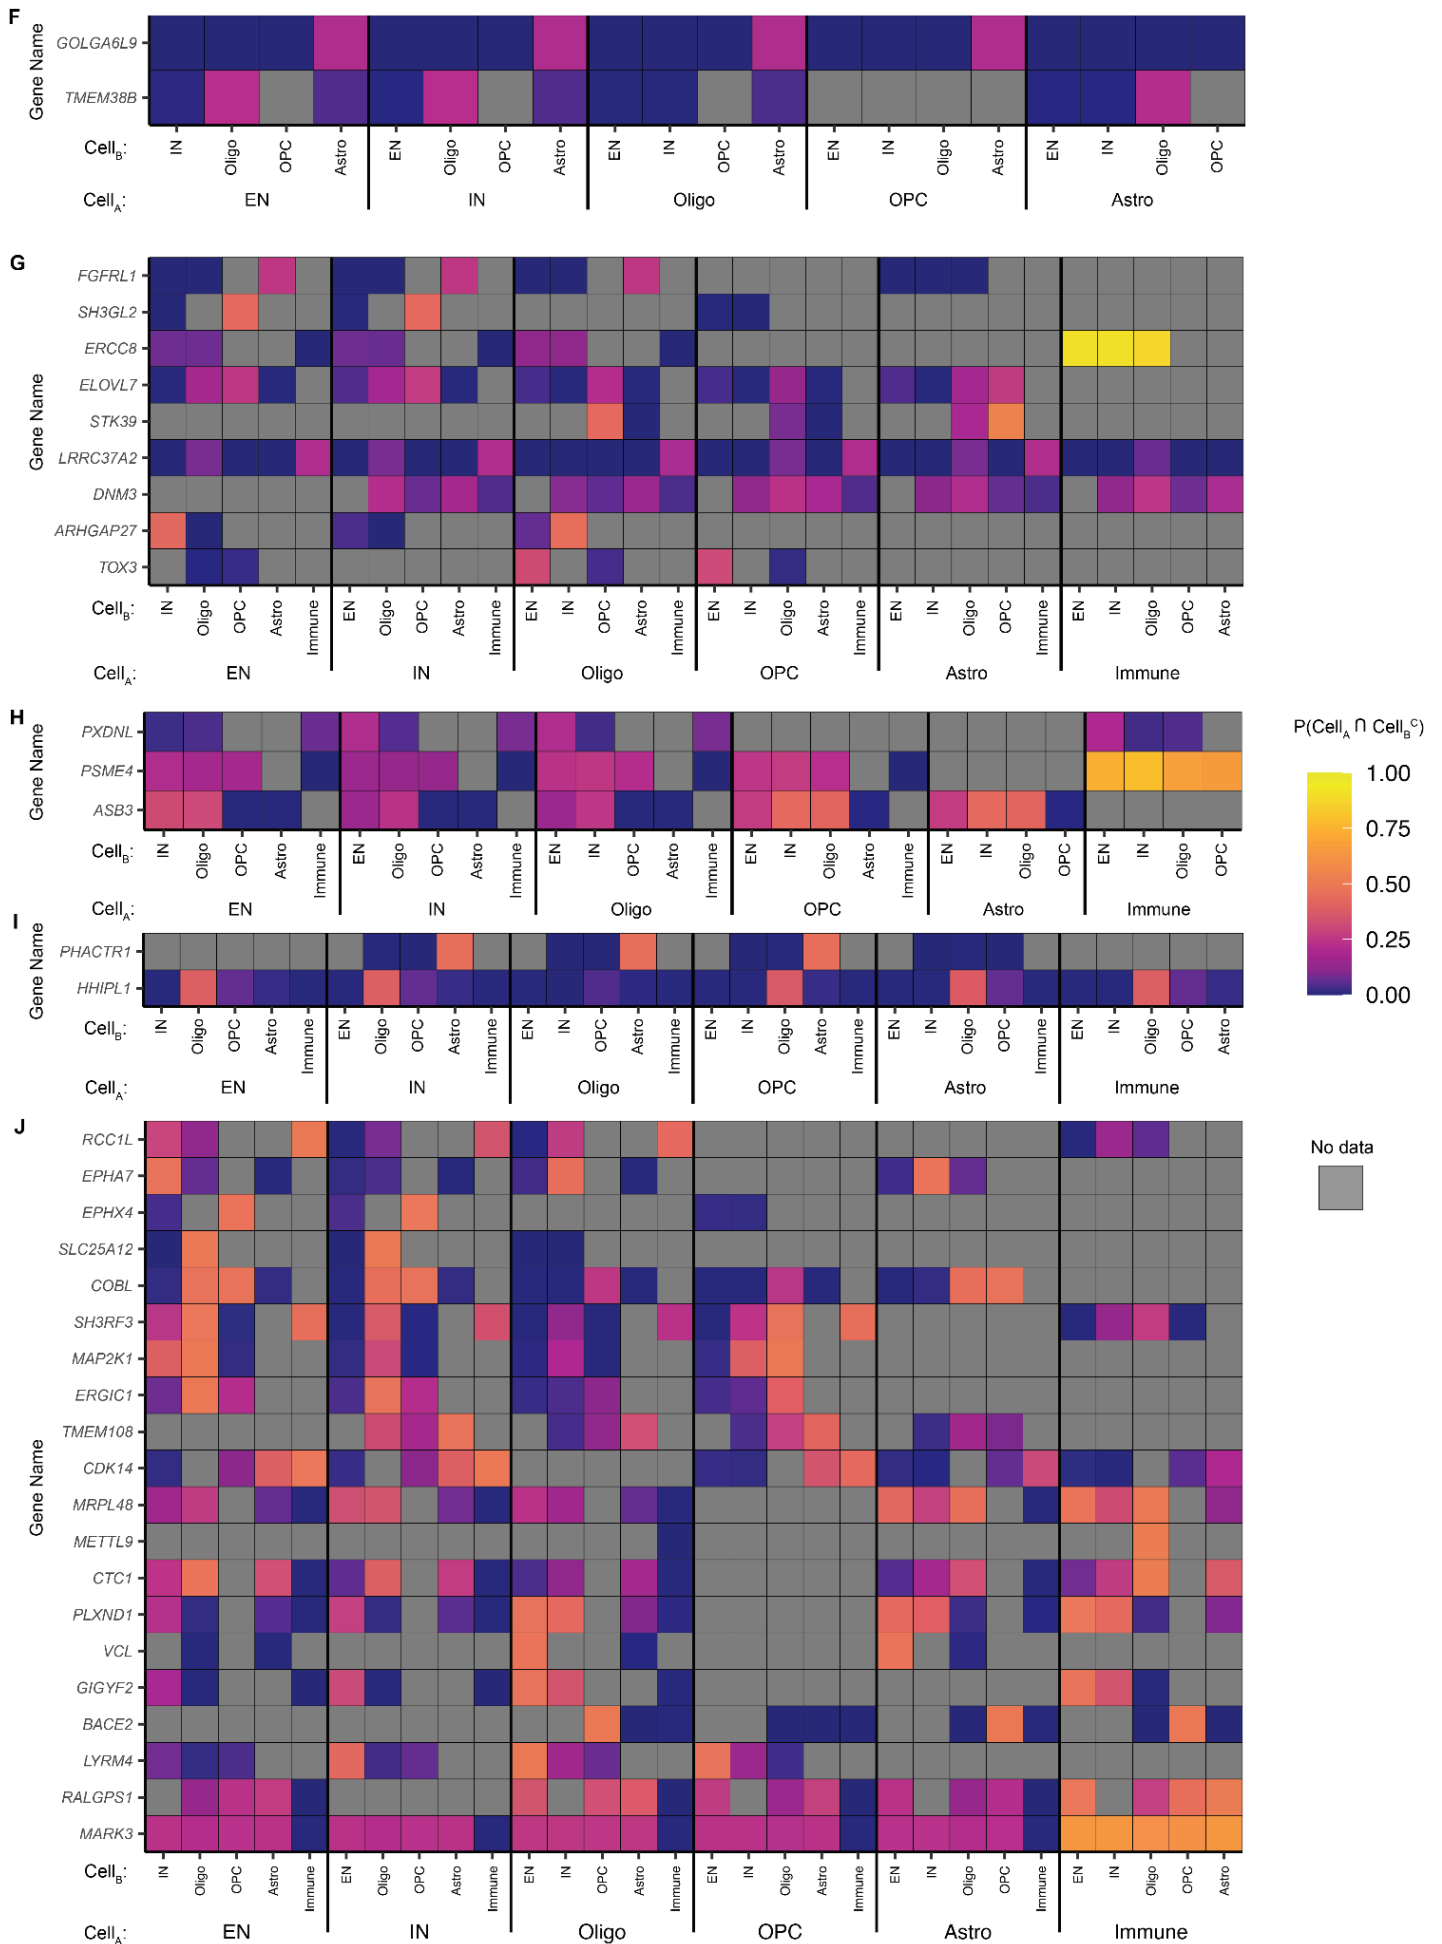

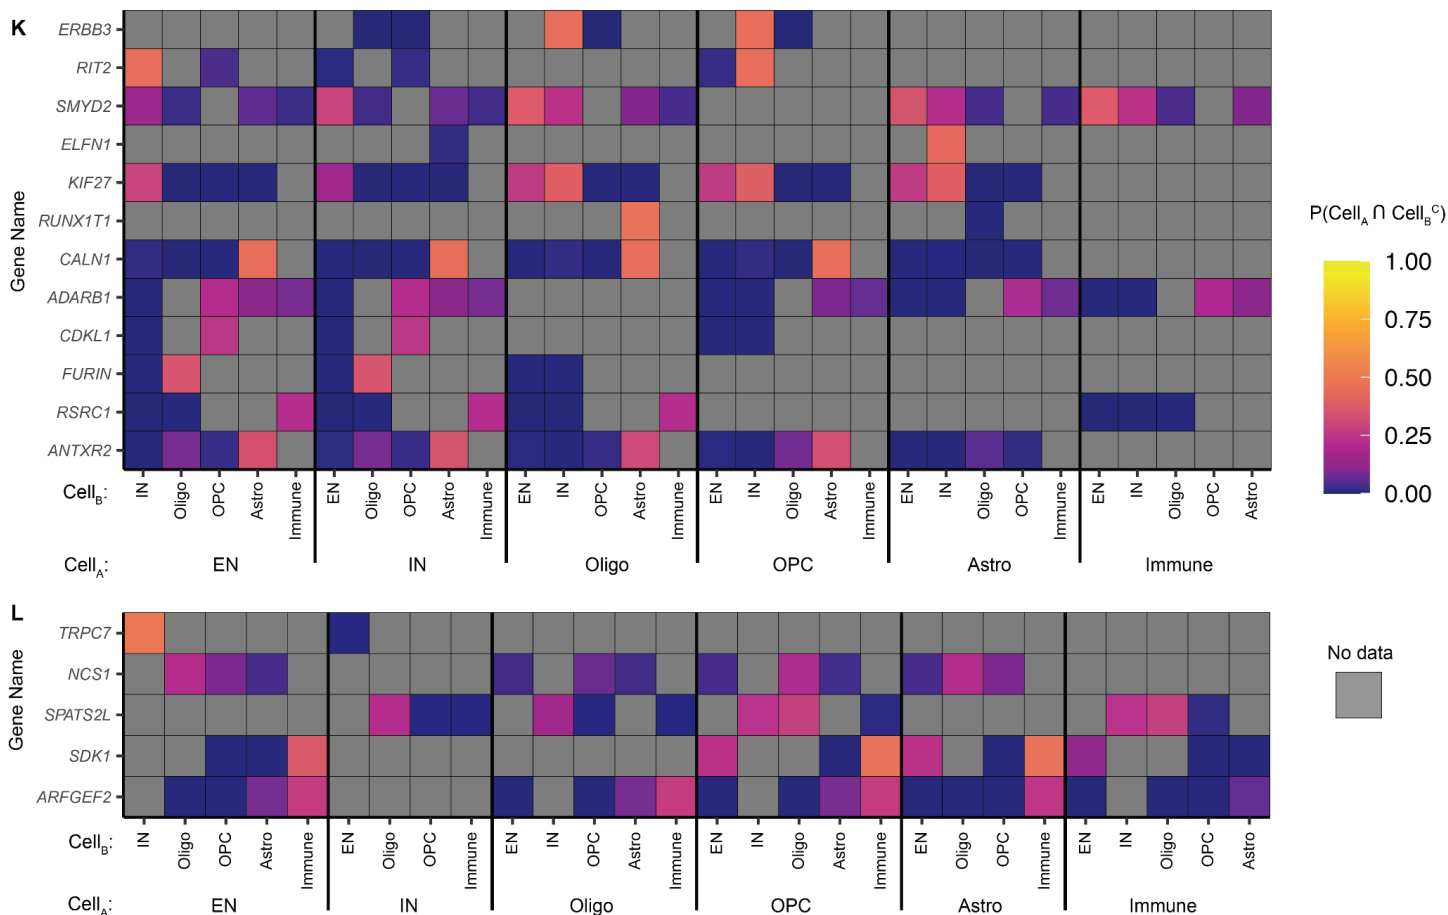

**Supplementary Fig. 6 | Multivariate adaptive shrinkage (mash) analysis in S-snTWAS traits.**

Heatmaps depicting the combinatorial probability that an effect exists in cell-type A and not in cell-type B at the class level. Only results with a  $P(\text{Cell}_A \cap \text{Cell}_B^c) \geq 0.2$  in at least one comparison were retained for visualization. The top 20 results (ordered by the maximum row-wise combinatorial probability) are displayed for BD (A), SCZ (B), AD (C), MS (D), AUD (E), ALS (F), PD (G), Anorexia (H), Migraines (I), MDD (J), ADHD (K), Insomnia (L). Cell type probabilities are estimated with mash. Cells are colored gray when the analysis is not applicable.

# Supplementary Fig. 7

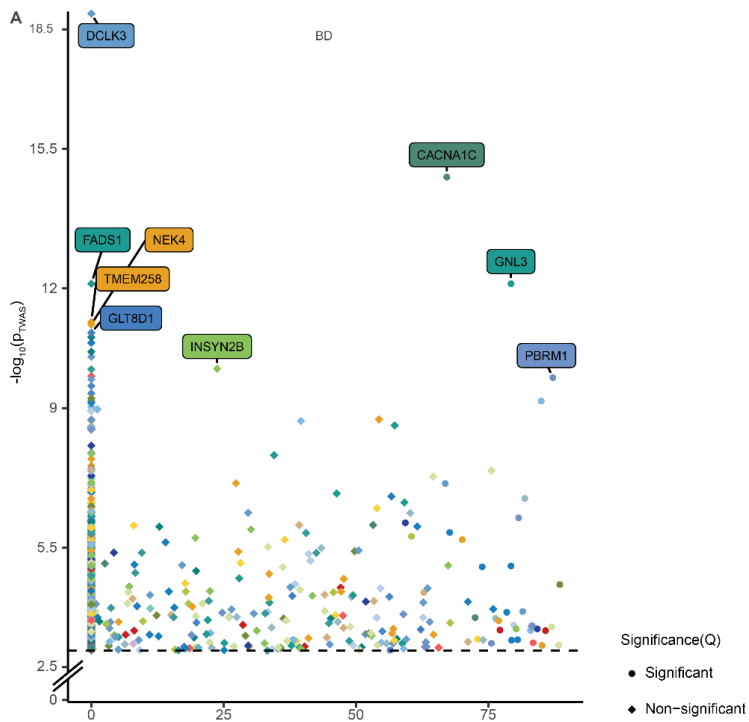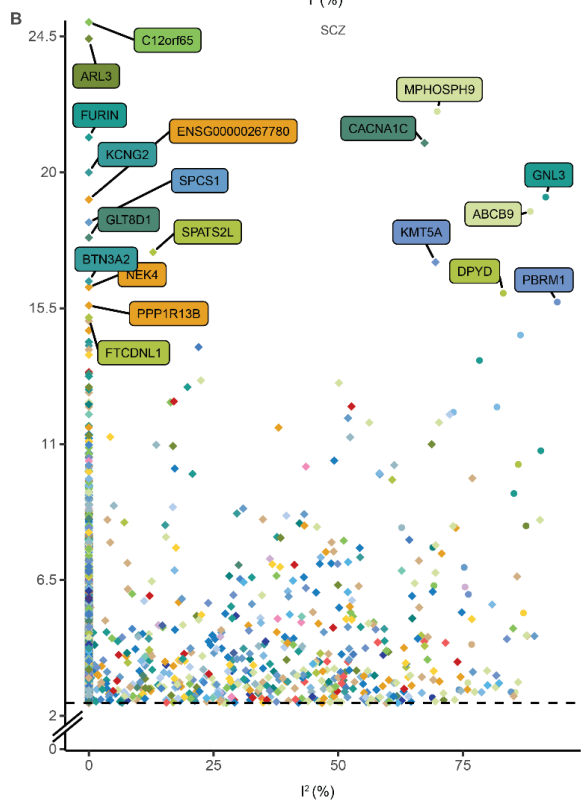

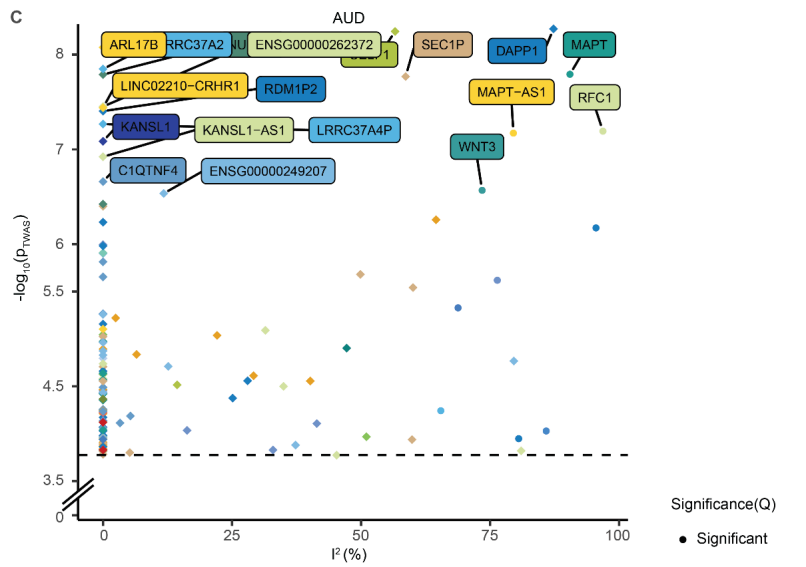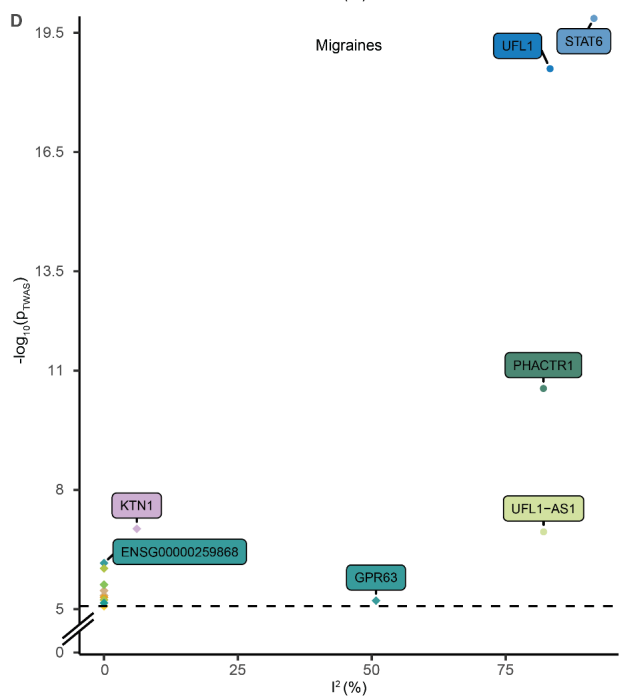

E

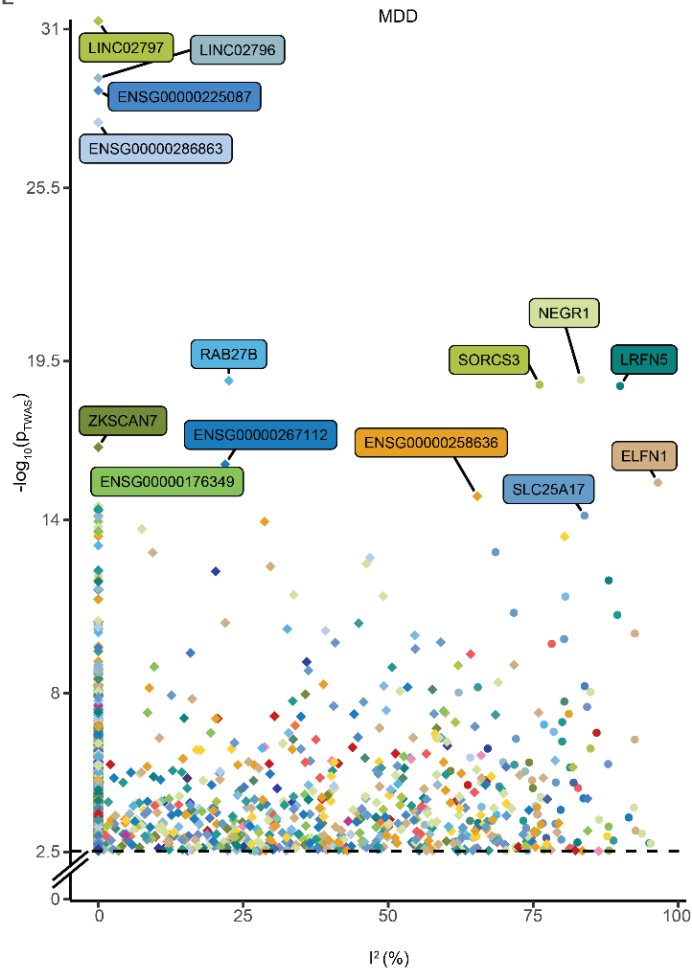

F

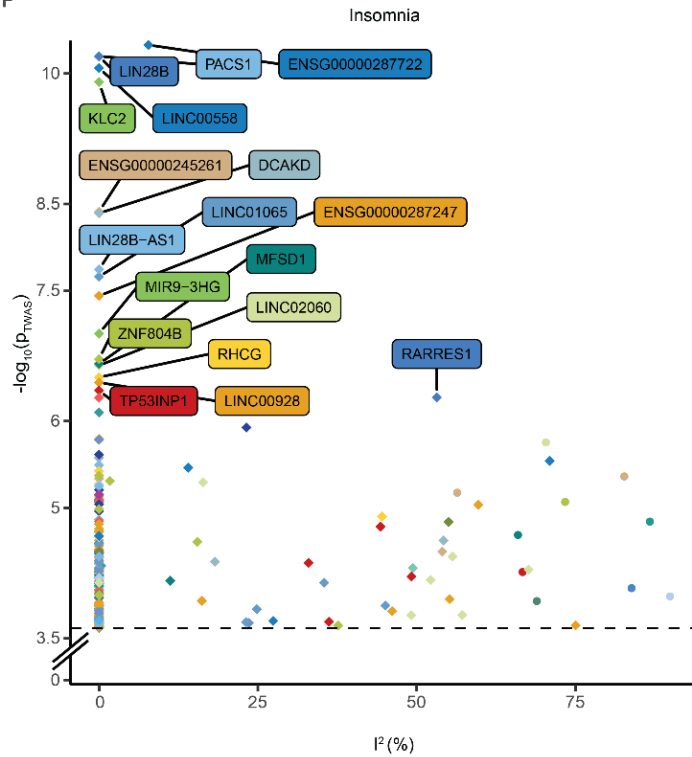

**Supplementary Fig. 7 | Gene-trait association effect size heterogeneity scatterplots.** Gene association effect size heterogeneity ( $I^2$ ) across cell types for BD (**A**), SCZ (**B**), AUD (**C**), Migraines (**D**), MDD (**E**), Insomnia (**F**). Significance denotes the presence of different effects of individual cell types in the analysis (Cochran's Q test). Only genes with significant GTAs in S-snTWAS analysis are visualized. Color corresponds to cell-type (Extended Data Fig. 2). Only traits with a high enough sample size in the MVP (see Methods) were evaluated for heterogeneity, due to need for effect size estimates. AD is visualized in Fig. 3C. ADHD, ALS, Anorexia, MS, and PD are excluded due to few cases in the MVP. PTSD and Anxiety are excluded due to few significant S-snTWAS associations.

## Supplementary Fig. 8

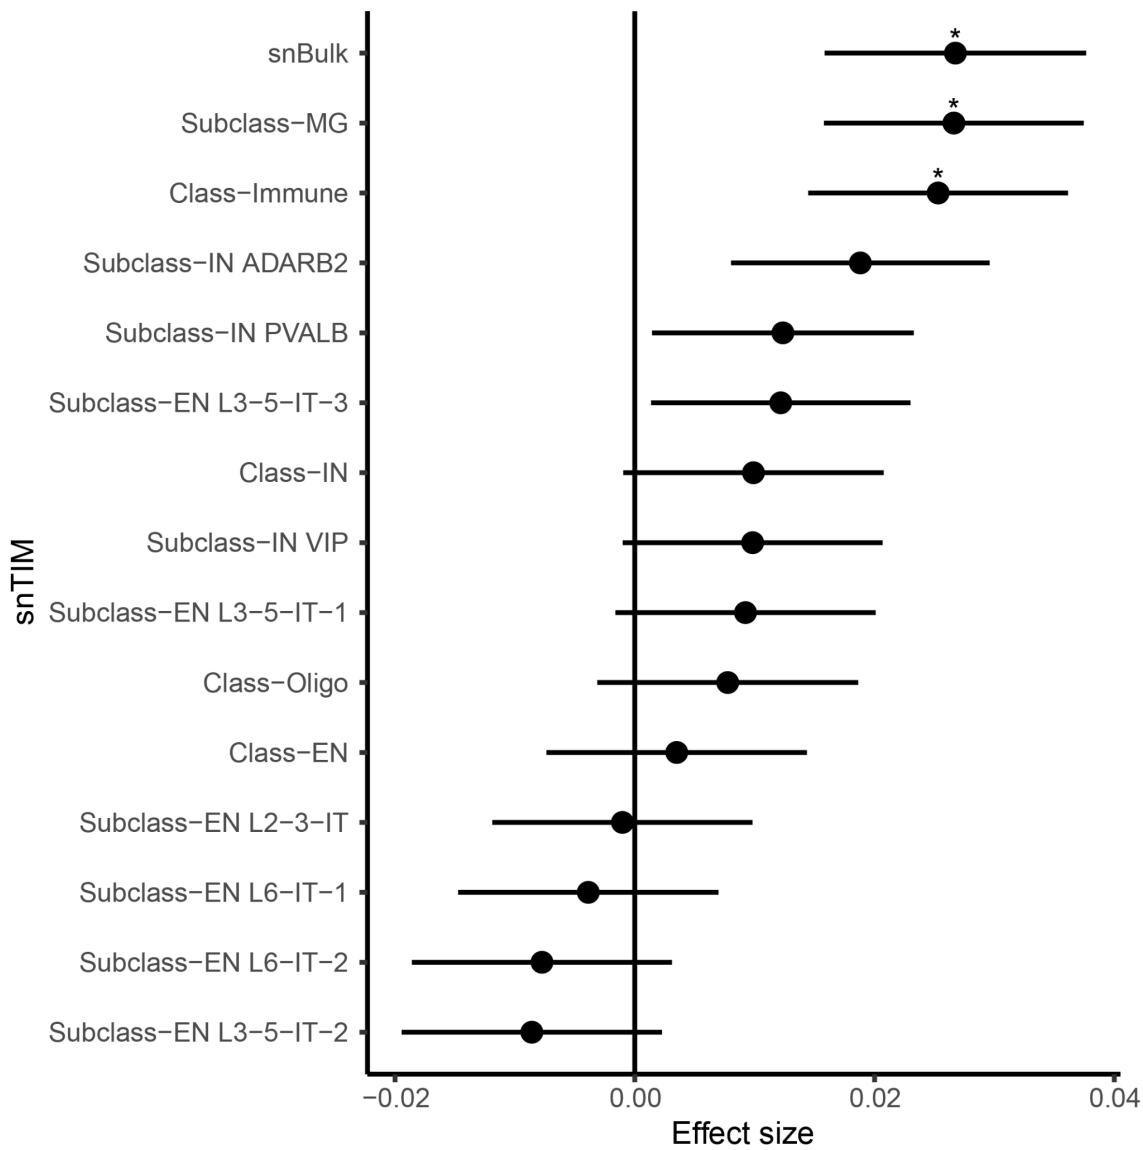

**Supplementary Fig. 8 | GTA:BIN1-AD Forest Plot.** Significant associations are marked by an asterisk. Horizontal bars denote the 95% confidence interval.



# Supplementary Fig. 9

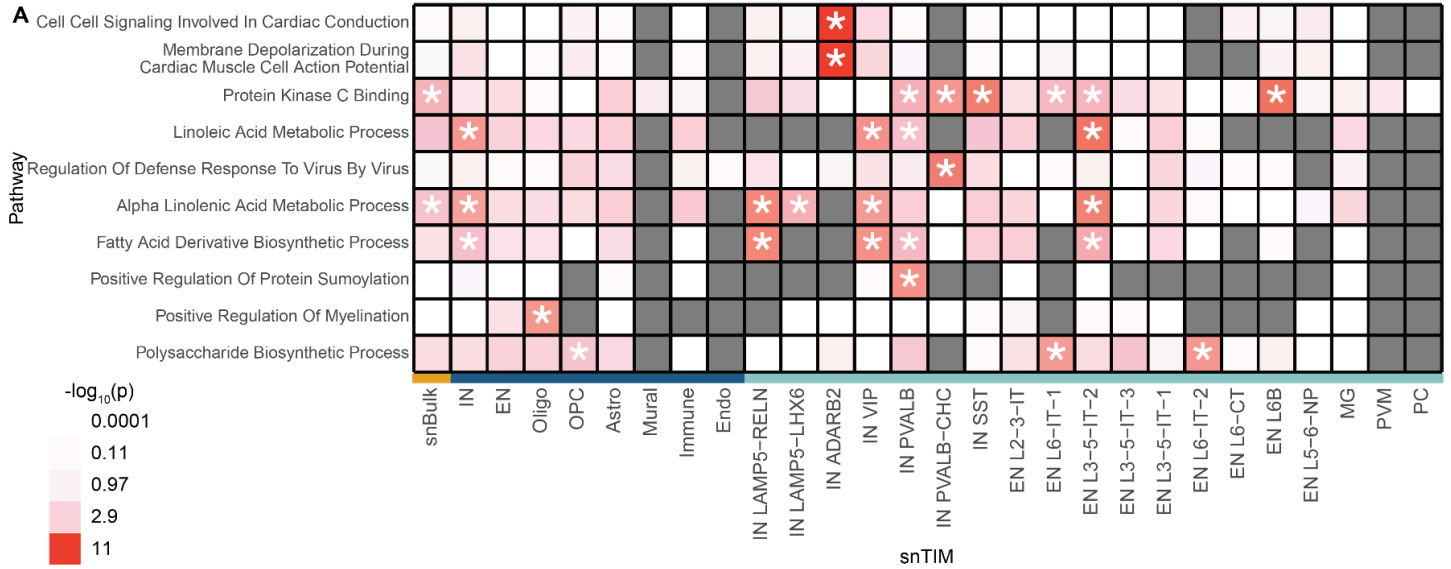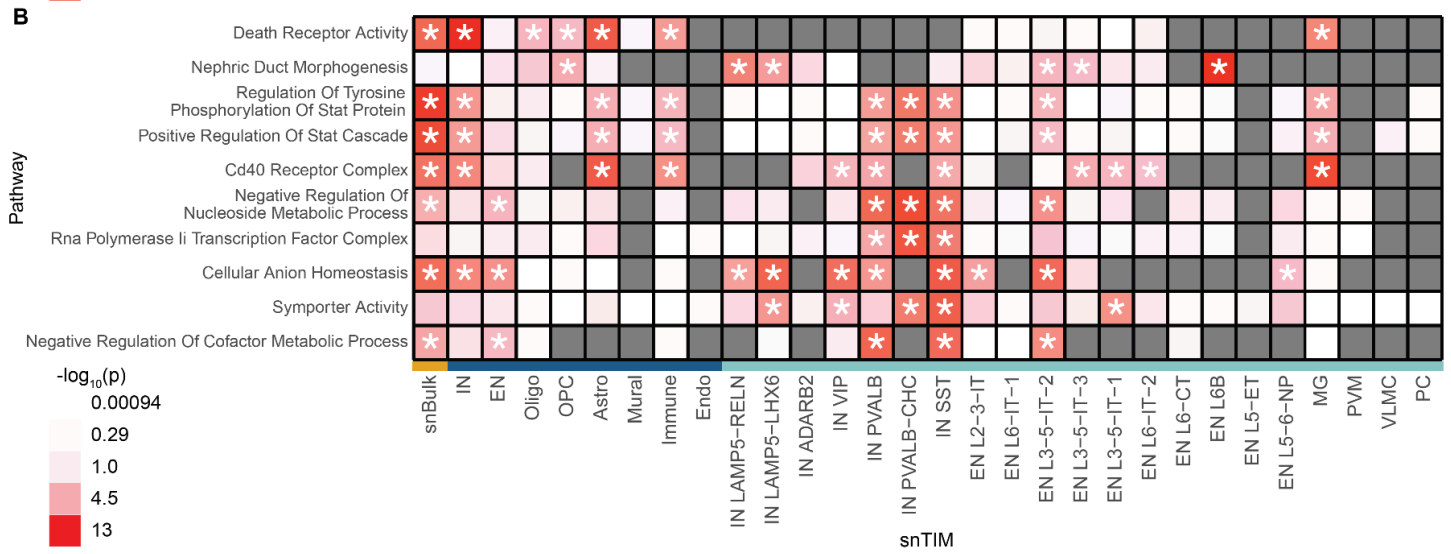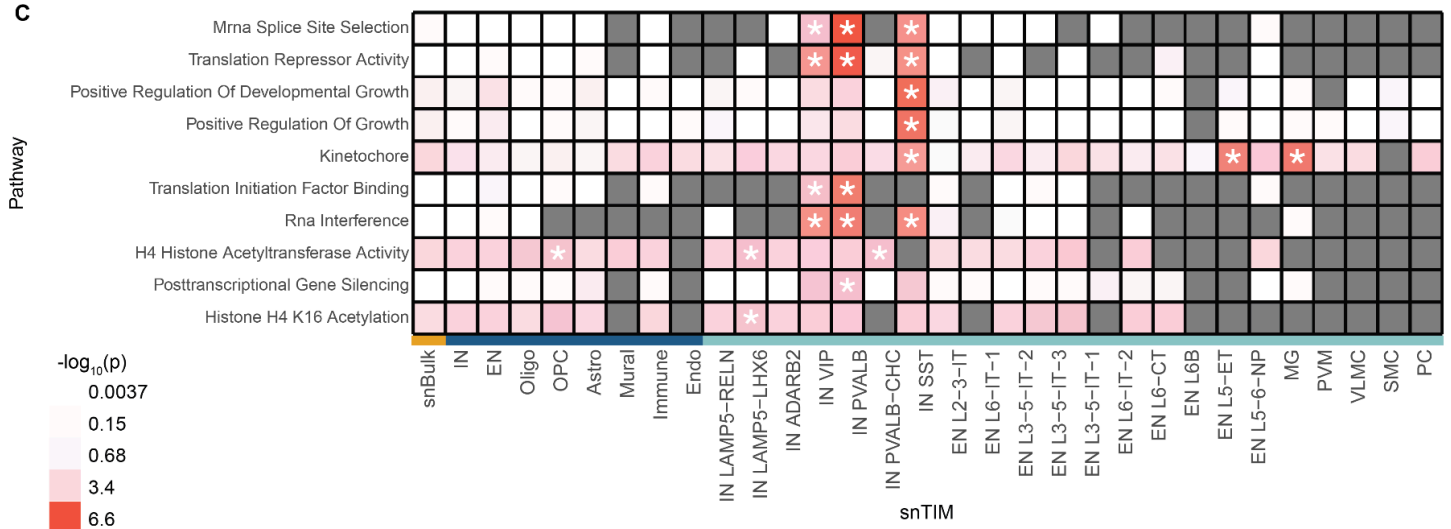





We describe the following traits in each panel: BD (**A**), MS (**B**), AUD (**C**), ALS (**D**), PD (**E**), Migraines (**F**), MDD (**G**), ADHD (**H**), Insomnia (**I**). AD and SCZ are described within Extended Data Fig. 5B.

# Supplementary Fig. 10

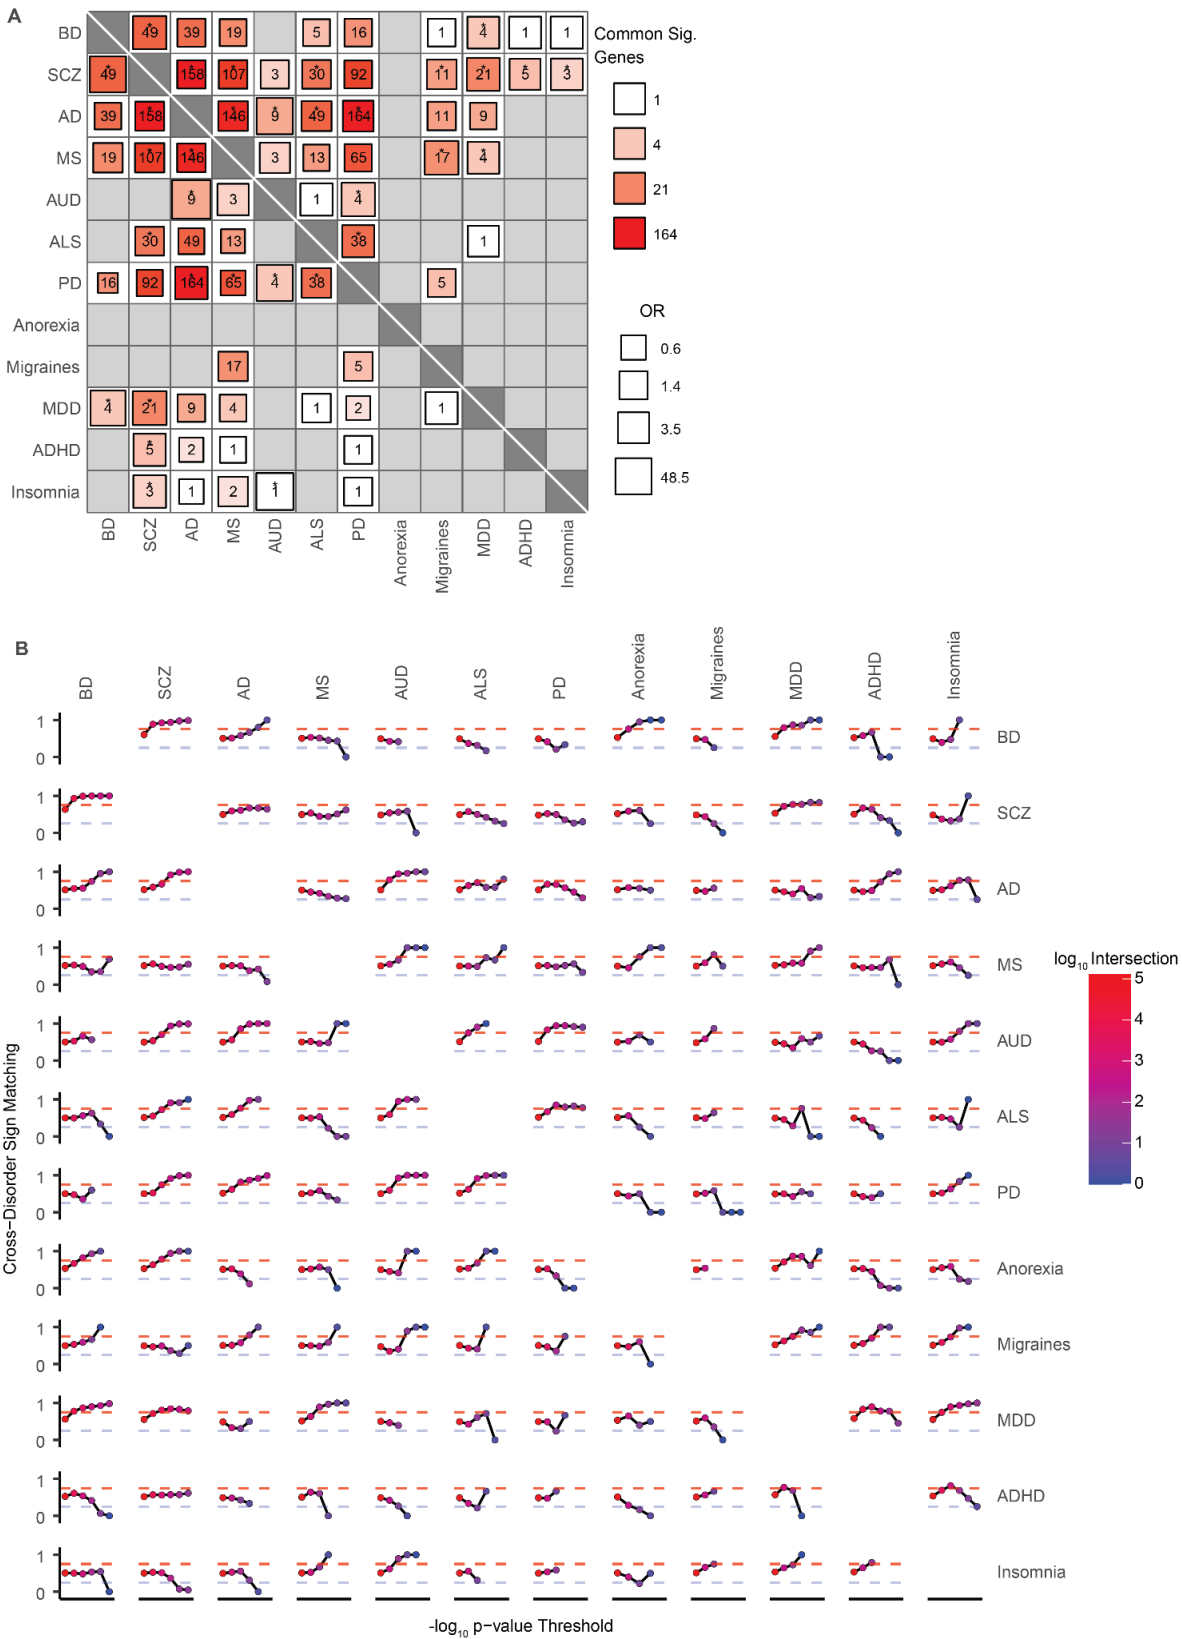

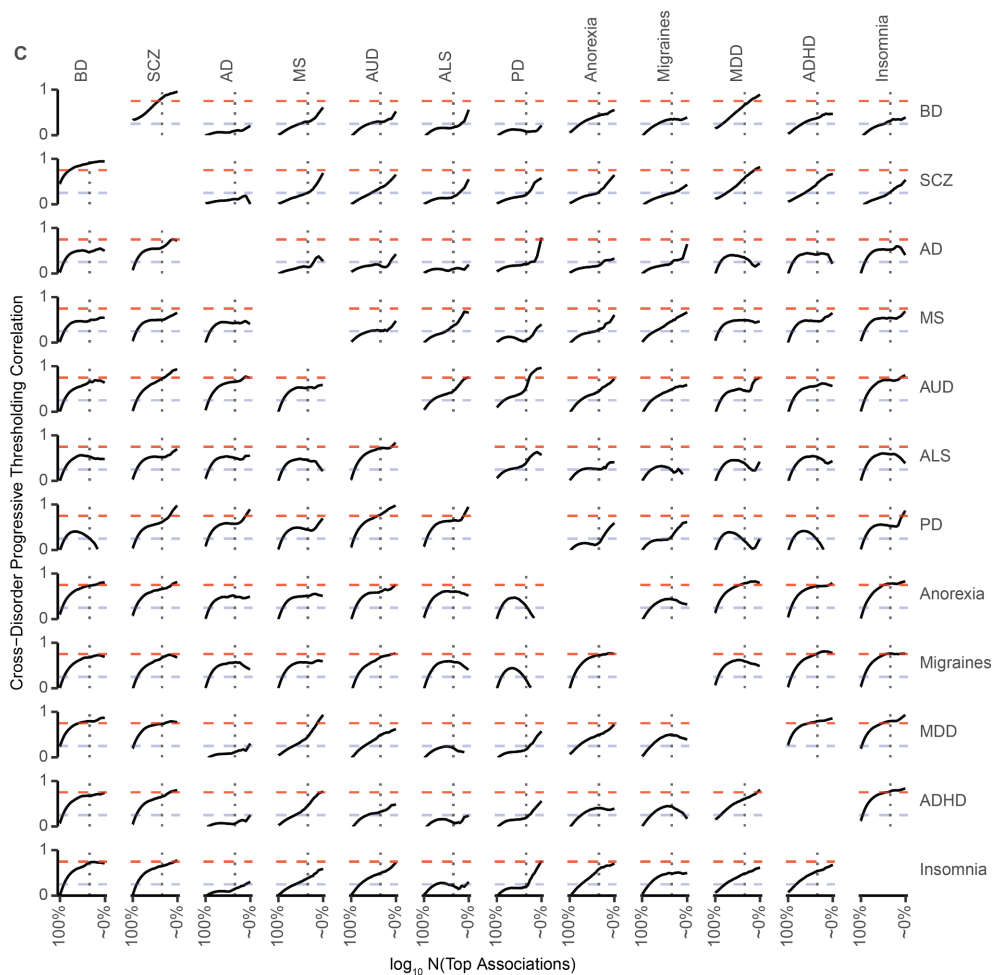

**Supplementary Fig. 10 | Cross-disorder concordance.** **A**, Fisher’s exact test Heatmap of cross-disorder significant gene sharing. *Lower-Left Triangle*: The number in each cell describes the number of shared significant genes (*lower-left triangle*) or pathways (*upper-right triangle*) between each pair of disorders. Fisher’s exact test p-values were FDR<sup>33</sup>-corrected, and significant values are annotated by asterisks. **B**, Cross-disorder association concordance. Each point represents the percent of concordant gene-cell-type (*Lower-Left Triangle*) or pathway-cell-type (*Upper-Right Triangle*) combinations (same association z-score sign) under the appropriate p-value threshold in both disorders. Each progressive point restricts the p-value threshold 10-fold (i.e.  $p \leq 1$ ,  $p \leq 1 \times 10^{-1}$ ,  $p \leq 1 \times 10^{-2}$ , ...). Red and blue dashed horizontal lines denote a 0.75 (75%) and 0.25 (25%) sign concordance, respectively. **C**, snTAS cross-disorder progressive thresholding correlation analysis (PTCA). Each line graph tracks the cross-disorder association z-score Pearson’s correlation for progressively higher ranked (see Methods) gene-cell-type (*Lower-Left Triangle*) or pathway-cell-type (*Upper-Right Triangle*) combinations. Red and blue dashed horizontal lines denote a 0.75 and 0.25 Pearson’s correlation coefficient ( $r$ ), respectively. Vertical dotted lines denote top 1% of gene-cell-type and pathway-cell-type combinations for the lower-left and upper-right triangles, respectively.

Supplementary Fig. 11

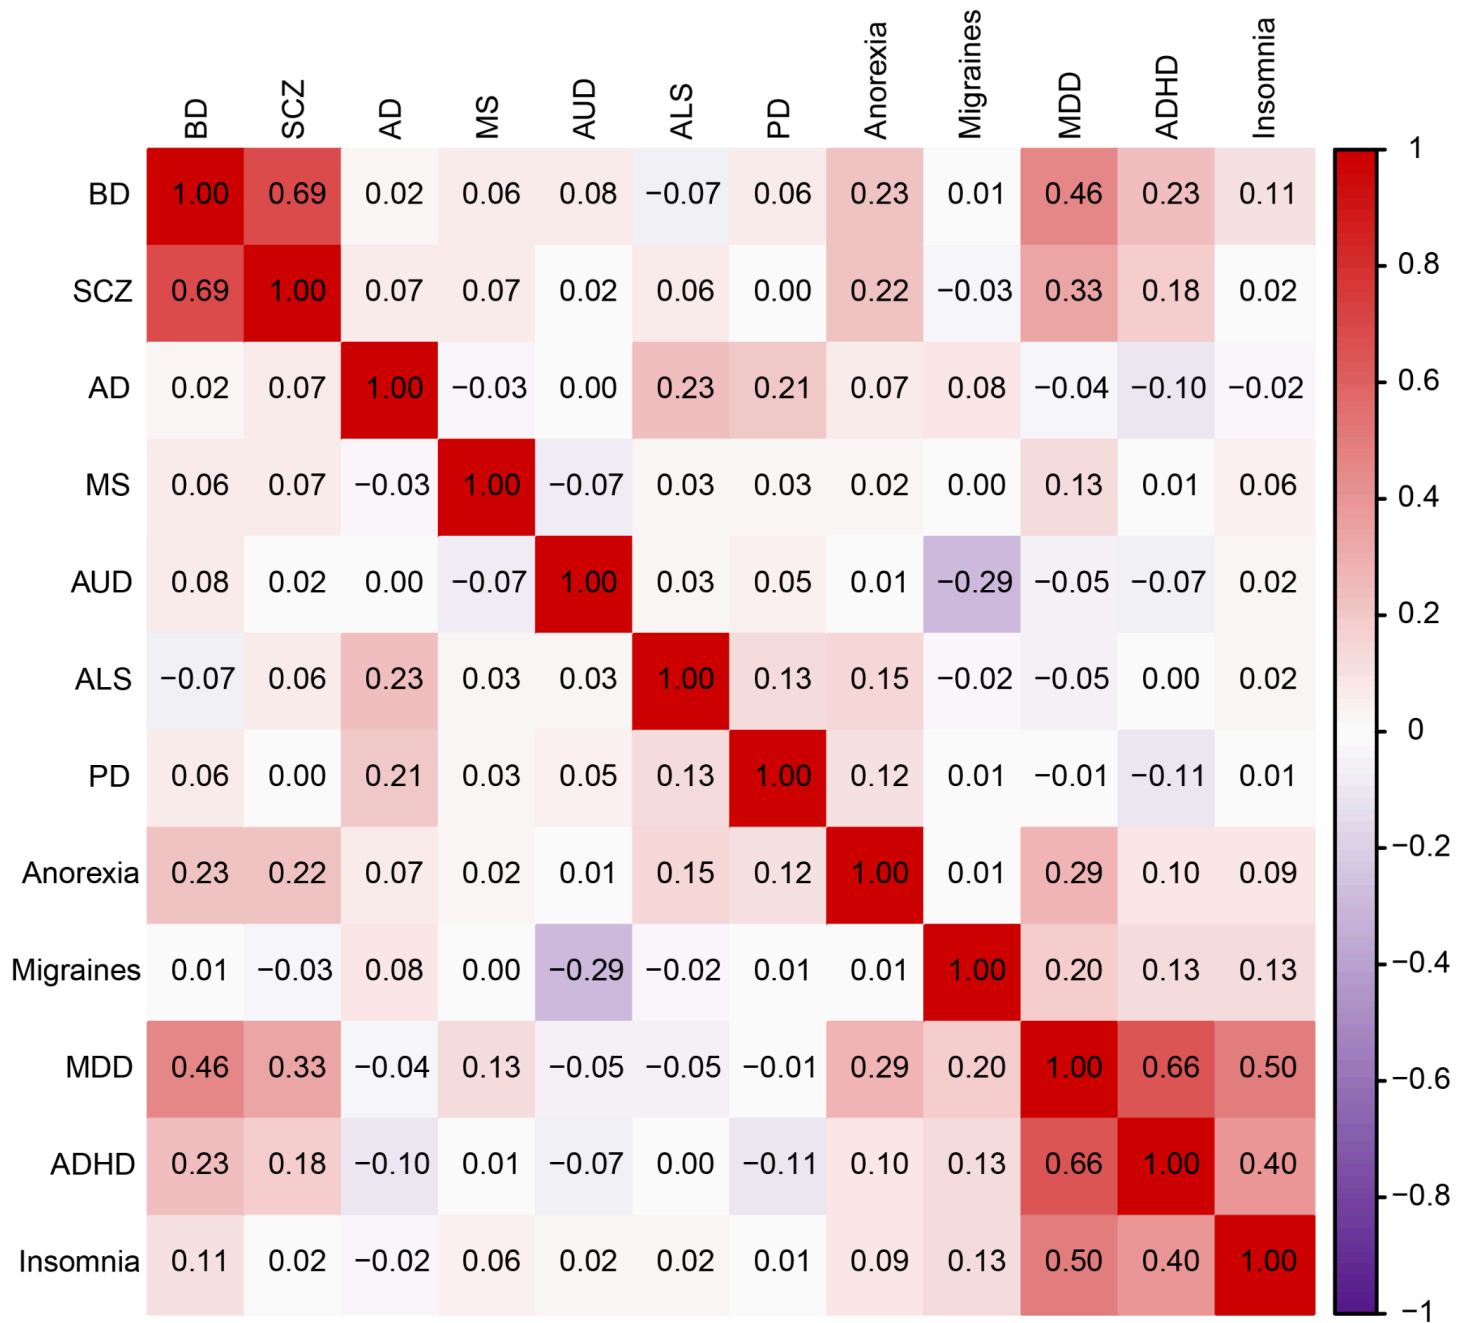

**Supplementary Fig. 11 | LD Score Regression bivariate heritability analysis.** Heatmap values range from -1 to 1 to indicate heritability correlation. Red indicates positive correlation, violet indicates negative correlation.

# Supplementary Fig. 12

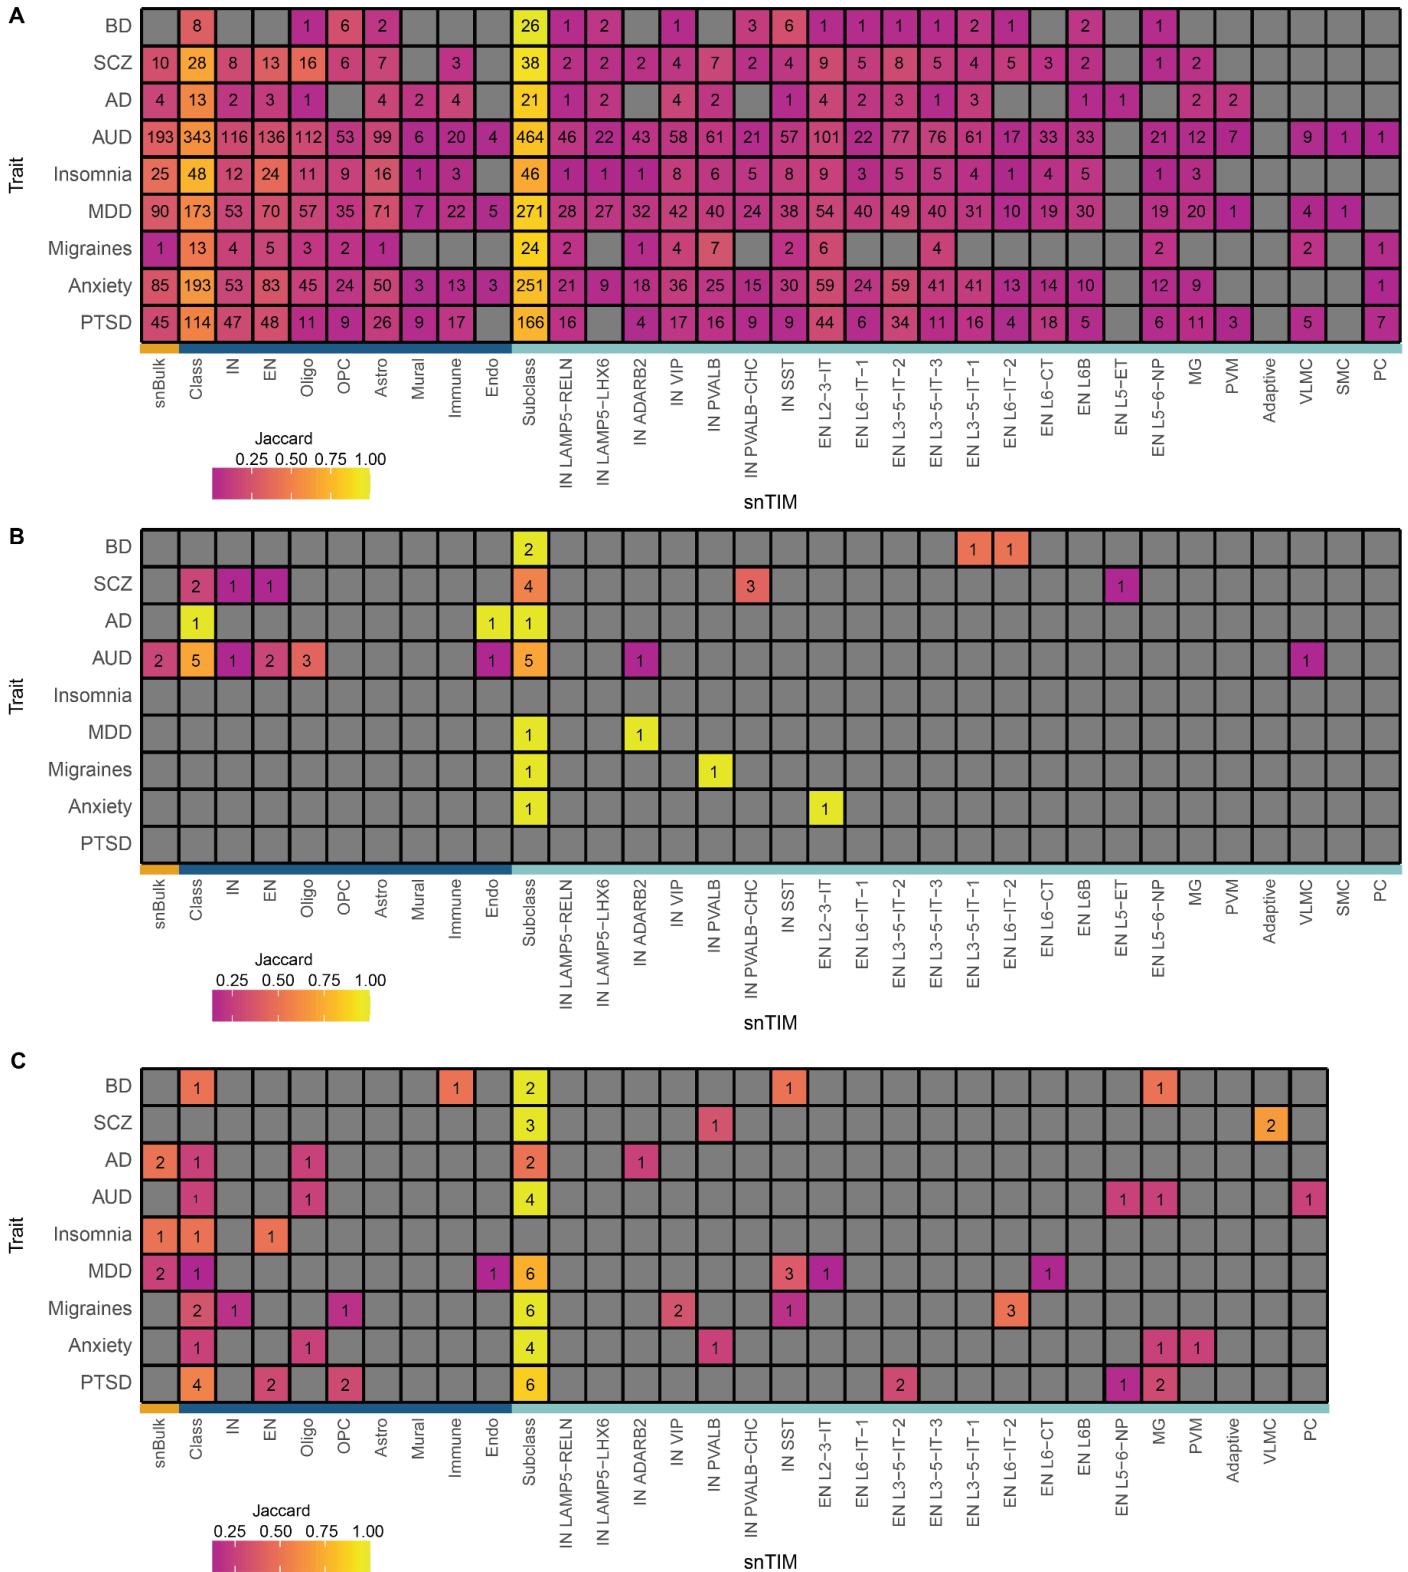

**Supplementary Fig. 12 | I-snTWAS GTA Heatmap for EUR (A), AFR (B) and AMR (C) ancestries.** The number within each cell represents the number of FDR<sup>33</sup>-significant gene-trait associations for the respective snTIM. “Class” and “Subclass” represent the number of FDR-significant genes among all class- and subclass-level snTIMs, respectively.



## Supplementary Fig. 13

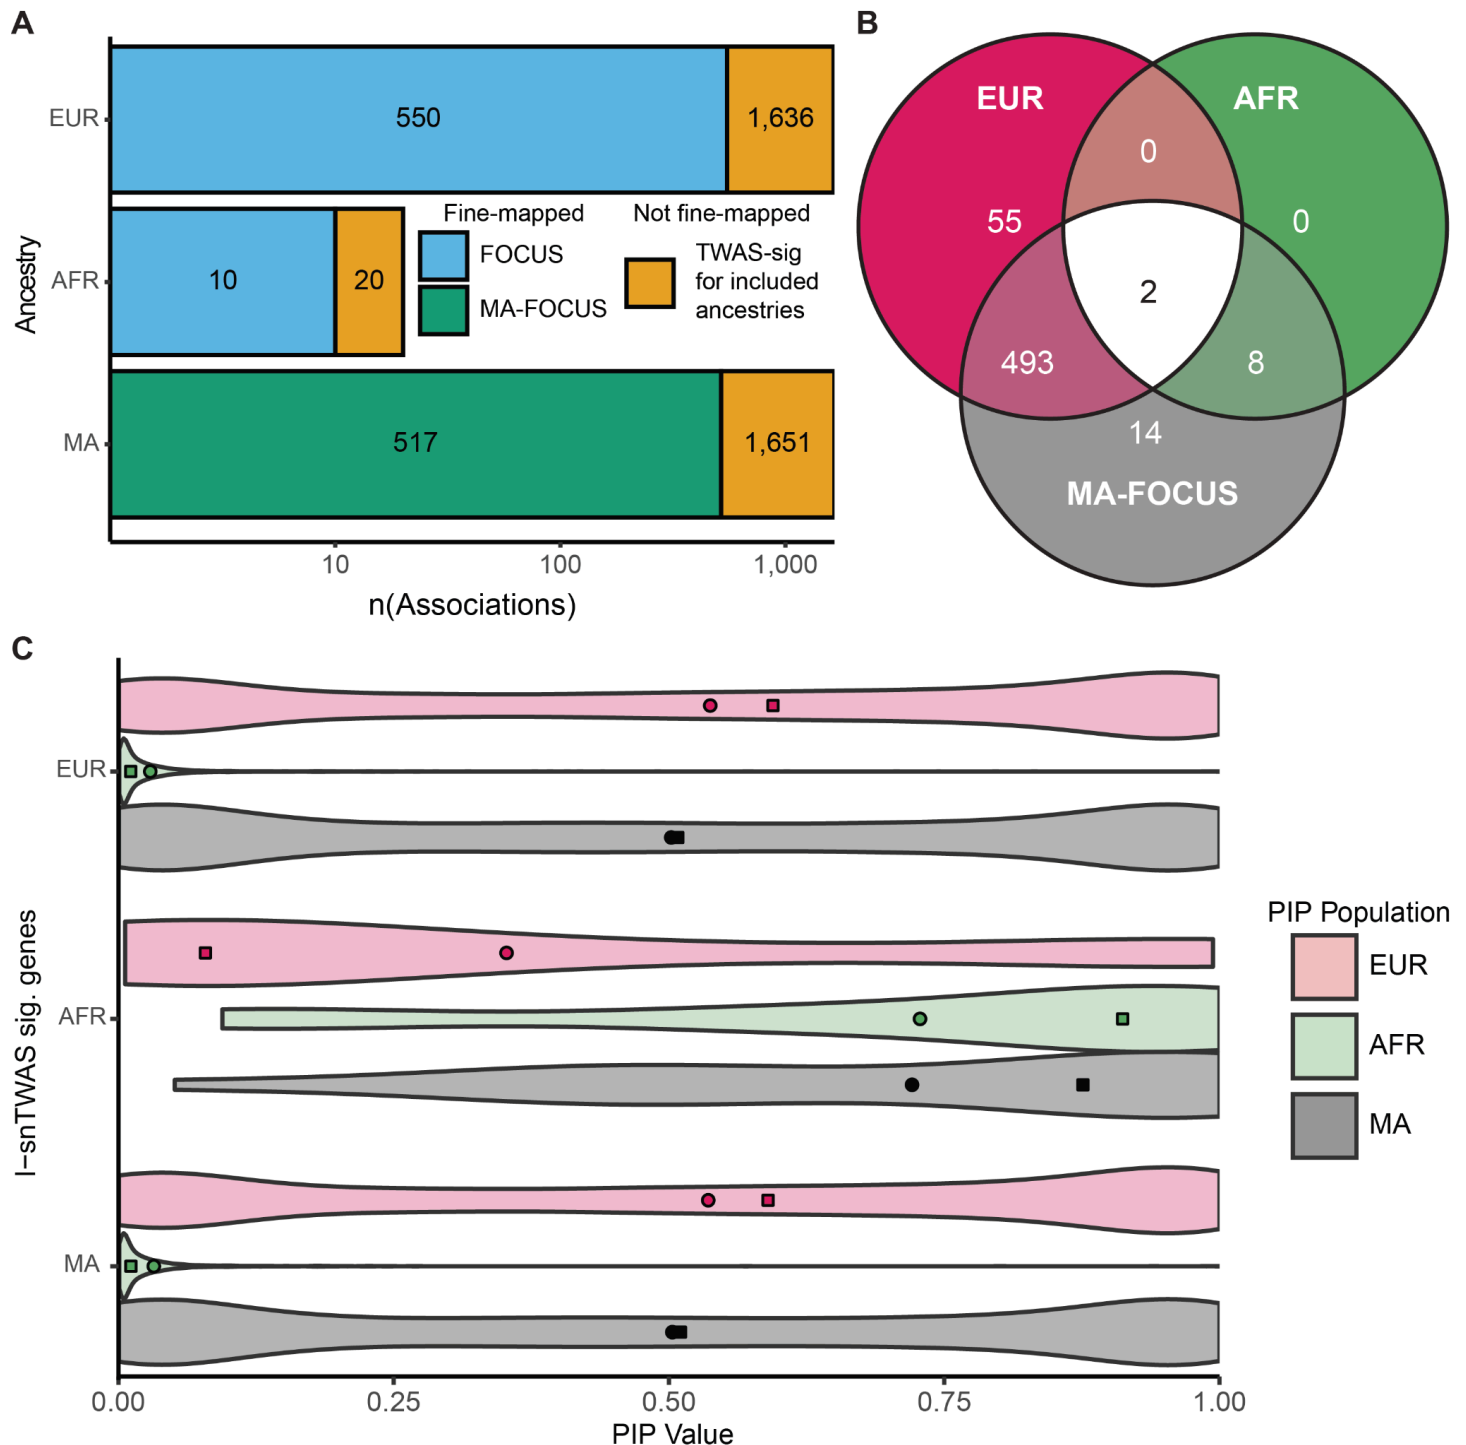

**Supplementary Fig. 13 | Overlap of cross-ancestry fine-mapping.** **A**, Overlap of TWAS and fine-mapping in single ancestry and multi-ancestry fine-mapping across the 9 I-snTWAS traits. Annotated numbers in the barplot indicate the total number of GTAs in each category (i.e. there are 550 fine-mapped GTAs in EUR and 1,636 I-snTWAS significant GTAs). Y-axis indicates the population in which analysis was performed. “MA” indicates the MA-FOCUS bi-ancestral analysis and the union of EUR and AFR I-snTWAS significant trait-gene-cell-type combinations for fine-mapping and TWAS, respectively. **B**, Overlap of fine-mapped GTAs (FOCUS for EUR and AFR; MA-FOCUS

for bi-ancestral EUR and AFR). **C**, Distribution of PIP values (FOCUS for EUR and AFR, MA-FOCUS for bi-ancestral EUR and AFR) amongst I-snTWAS significant trait-gene-cell-type combinations for each ancestry (“MA” indicates the union of EUR and AFR I-snTWAS significant trait-gene-cell-type combinations). Square points indicate the median values of each distribution and circular points indicate the mean values of each distribution.

# Supplementary Fig. 14

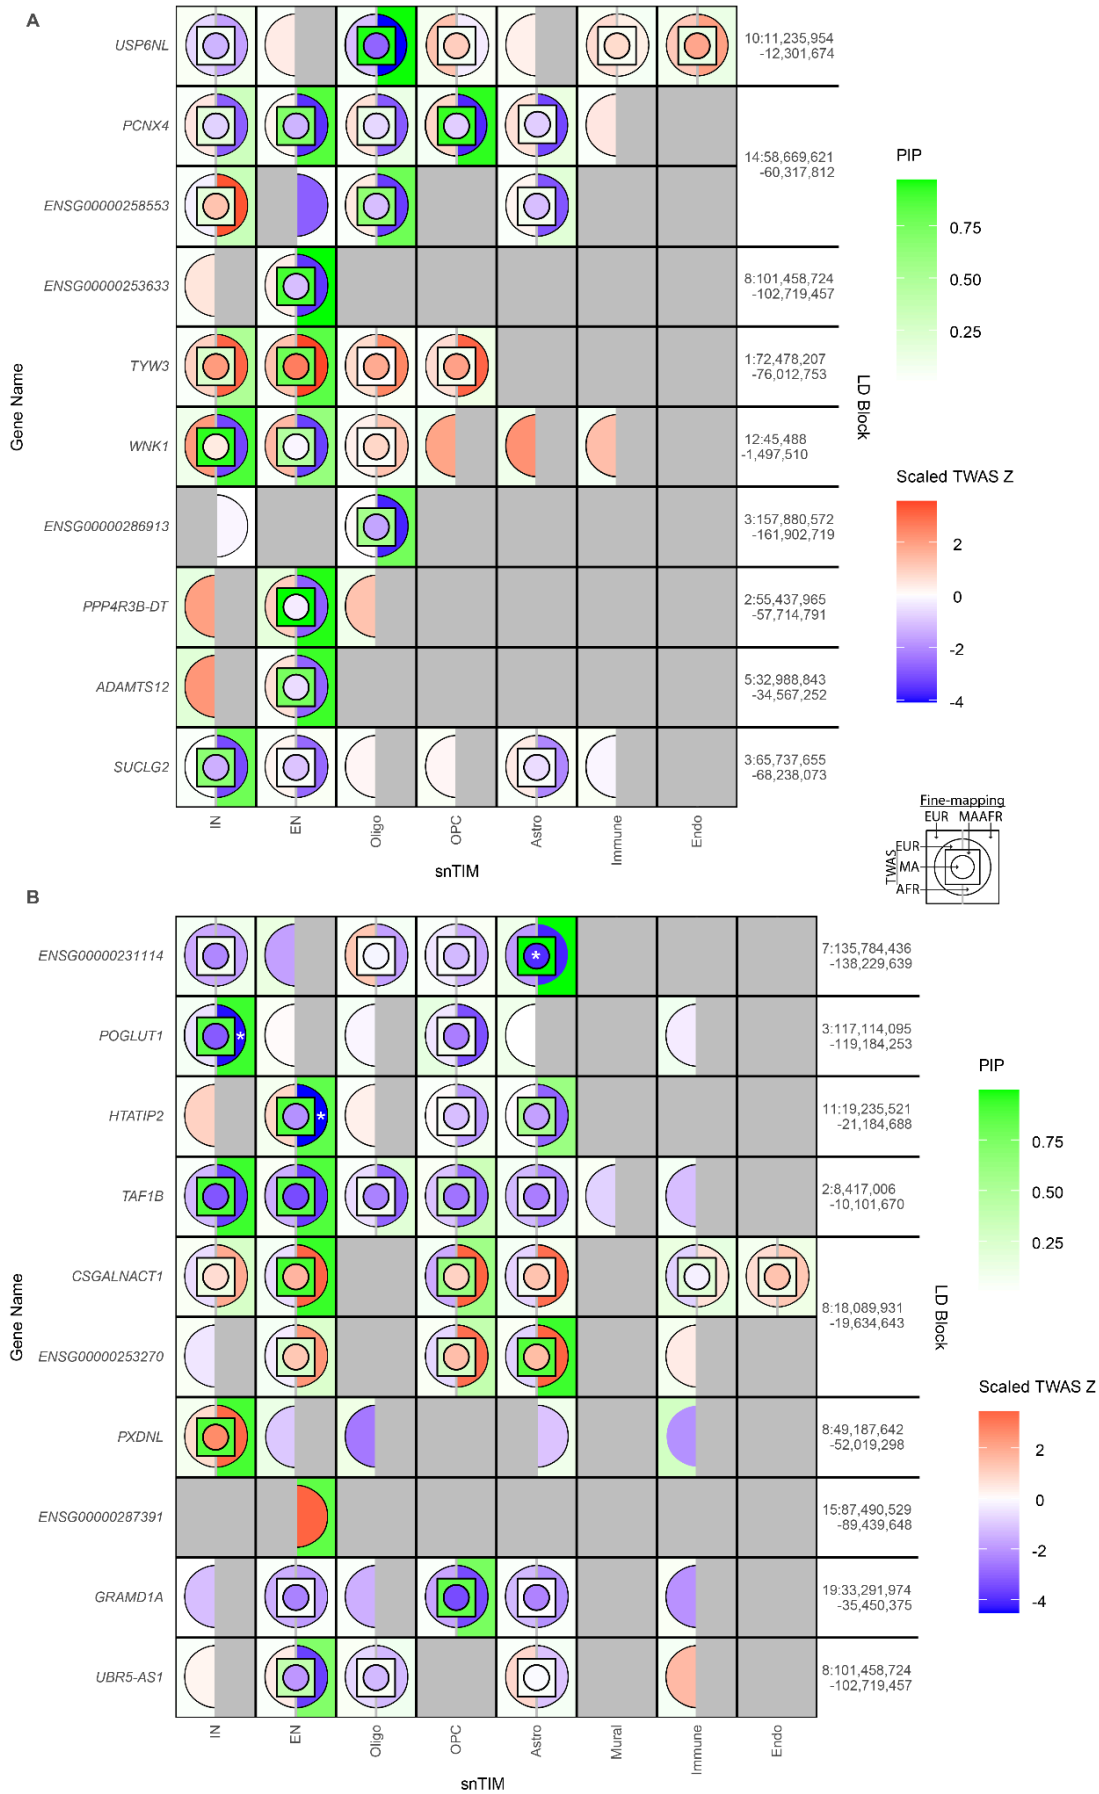

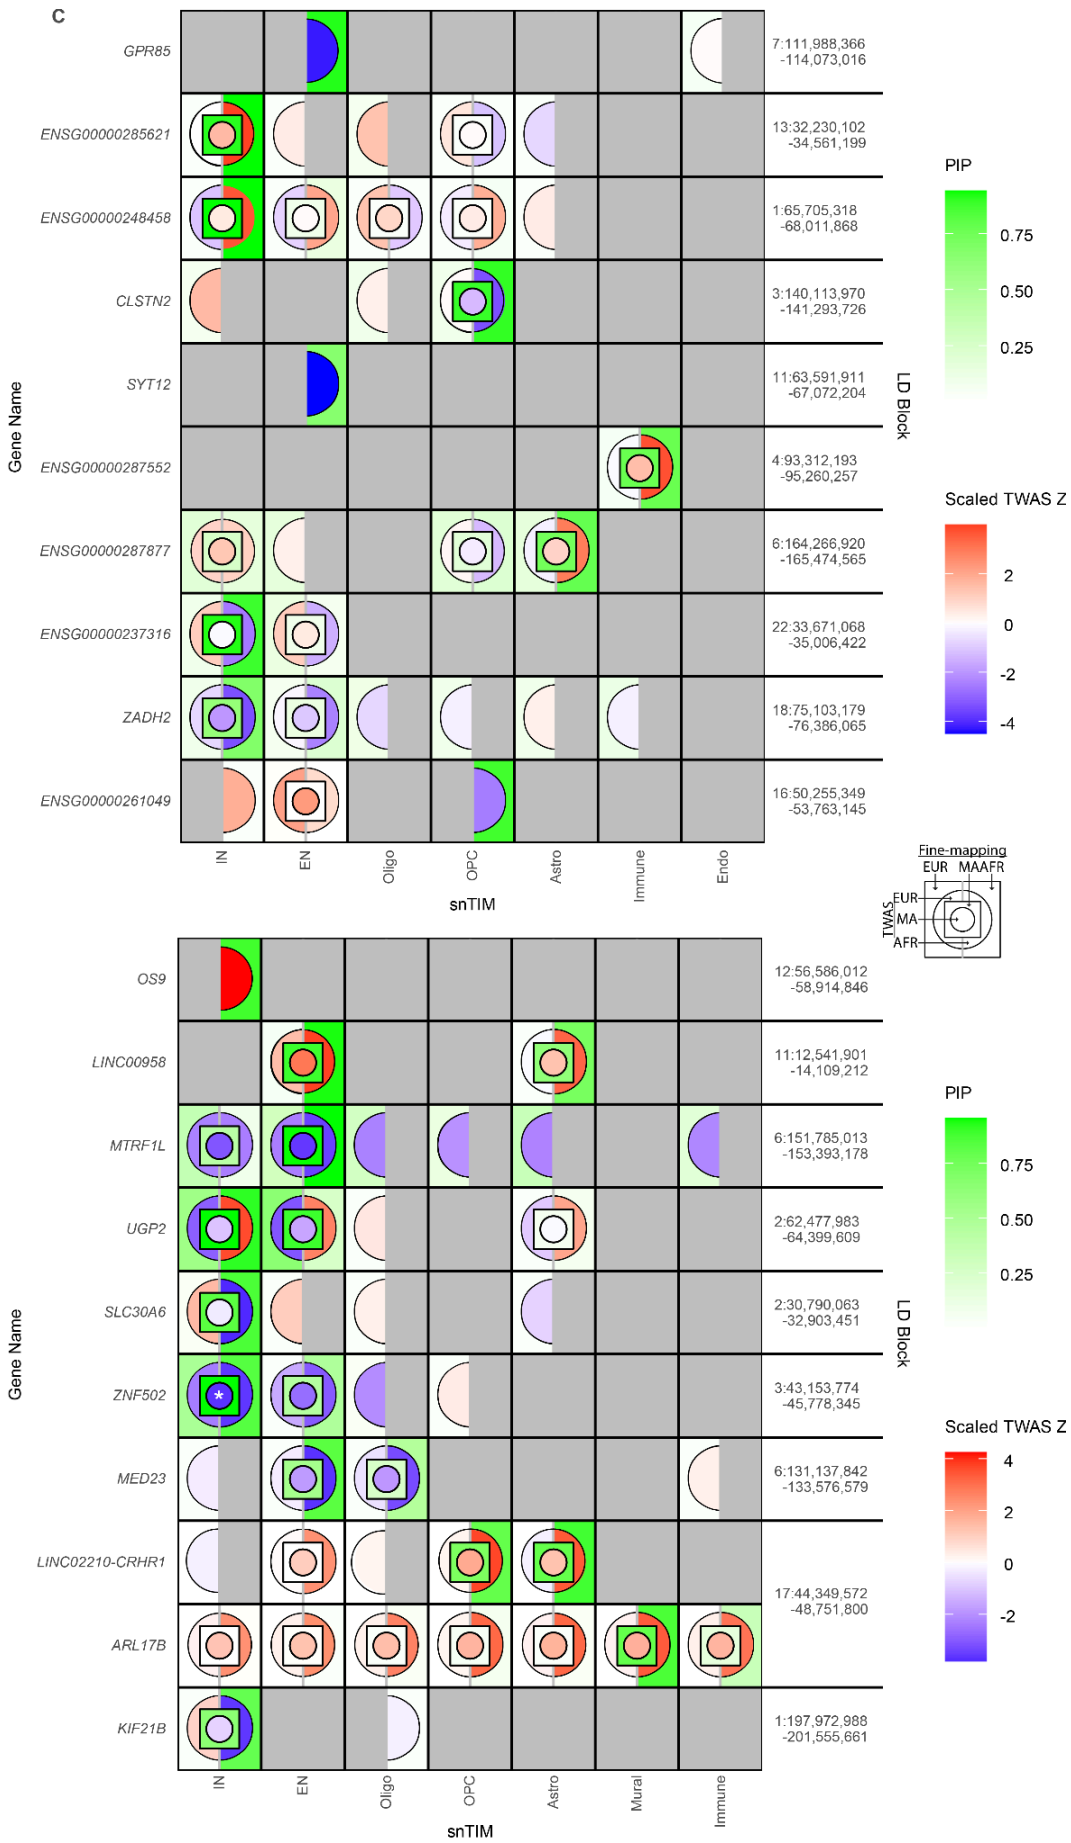

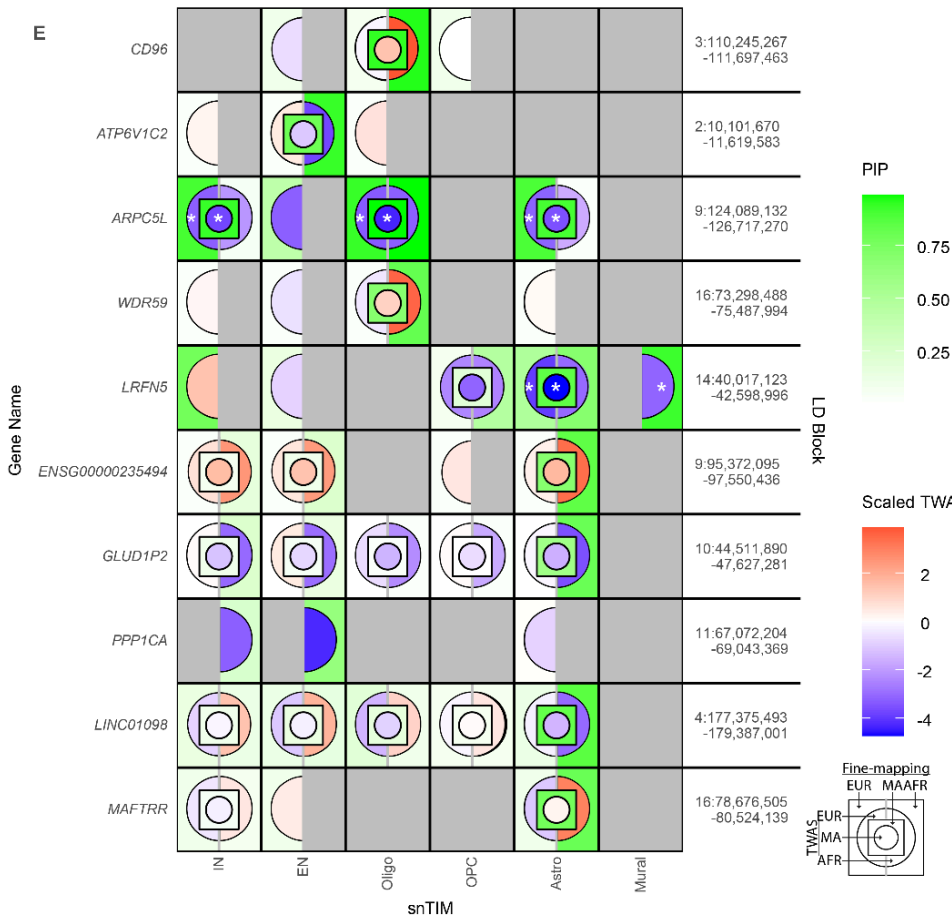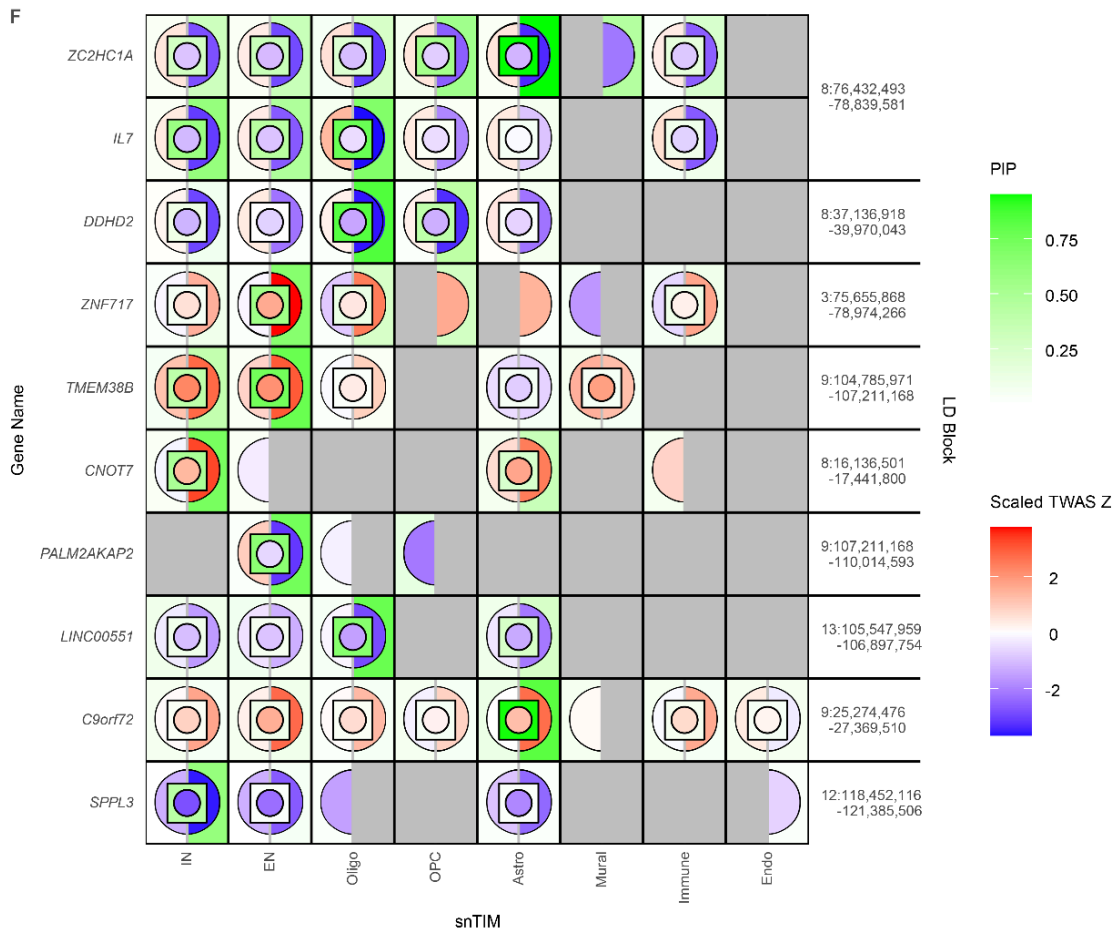

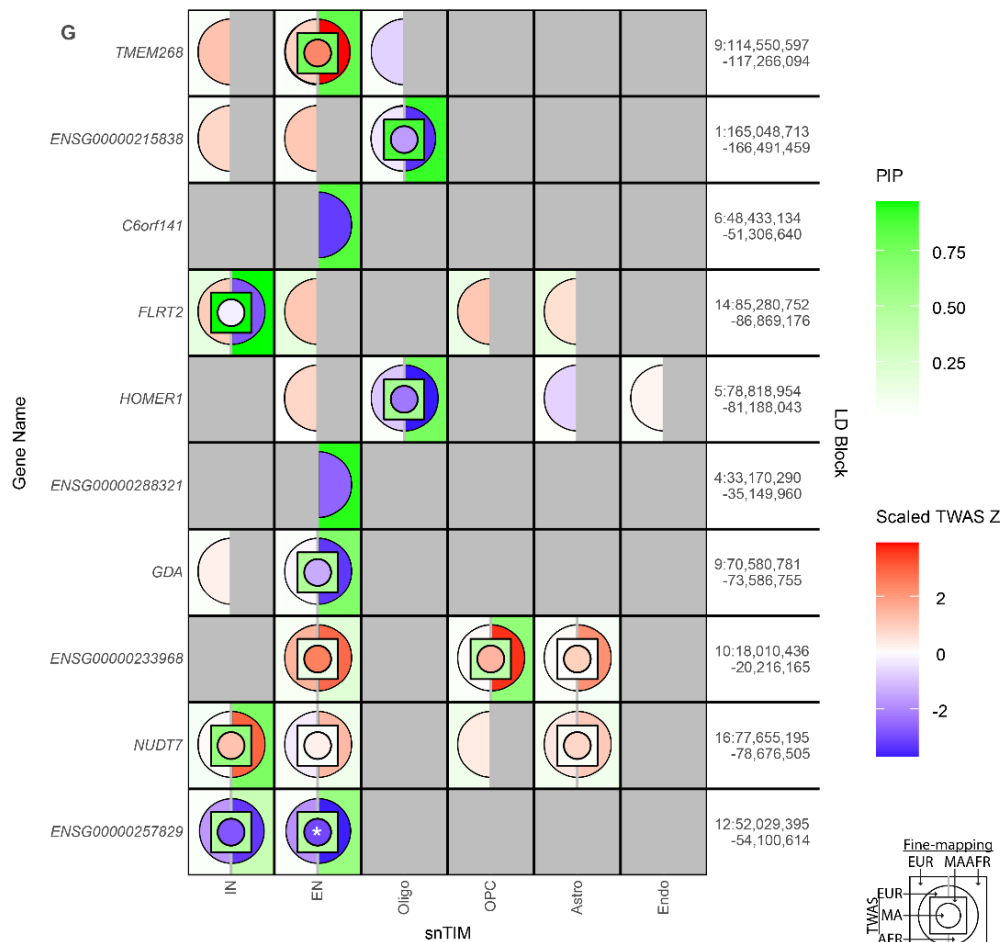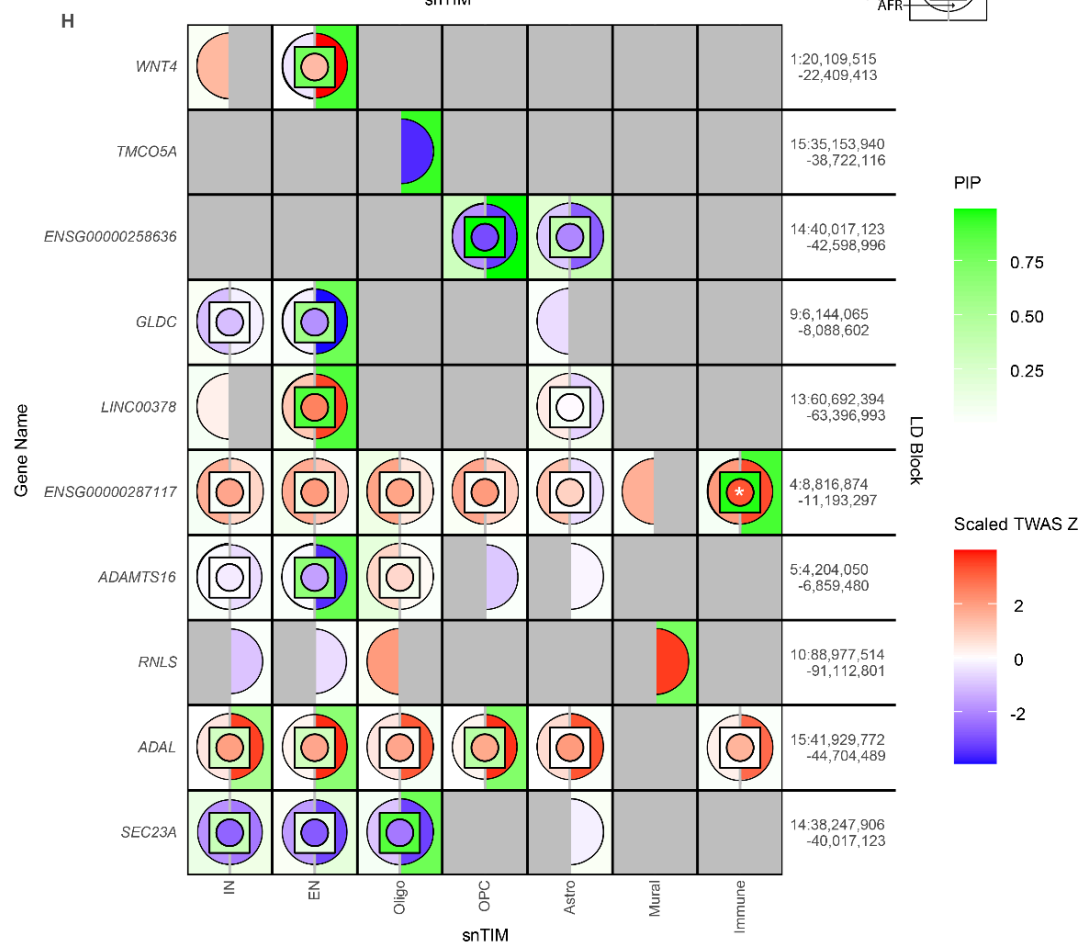

**Supplementary Fig. 14 | MAFOCUS plots for NPD/NDDs.** Bi-ancestral (EUR and AFR) fine-mapping of BD (**A**), SCZ (**B**), AD (**C**), Insomnia (**D**), MDD (**E**), Migraines (**F**), Anxiety (**G**), PTSD (**H**). The top 10 trait-associated genes in the AFR I-snTWAS analysis are visualized across class level snTIMs. Z-scores are scaled across all genes within each population. AUD is visualized in Fig. 5E.

Supplementary Fig. 15

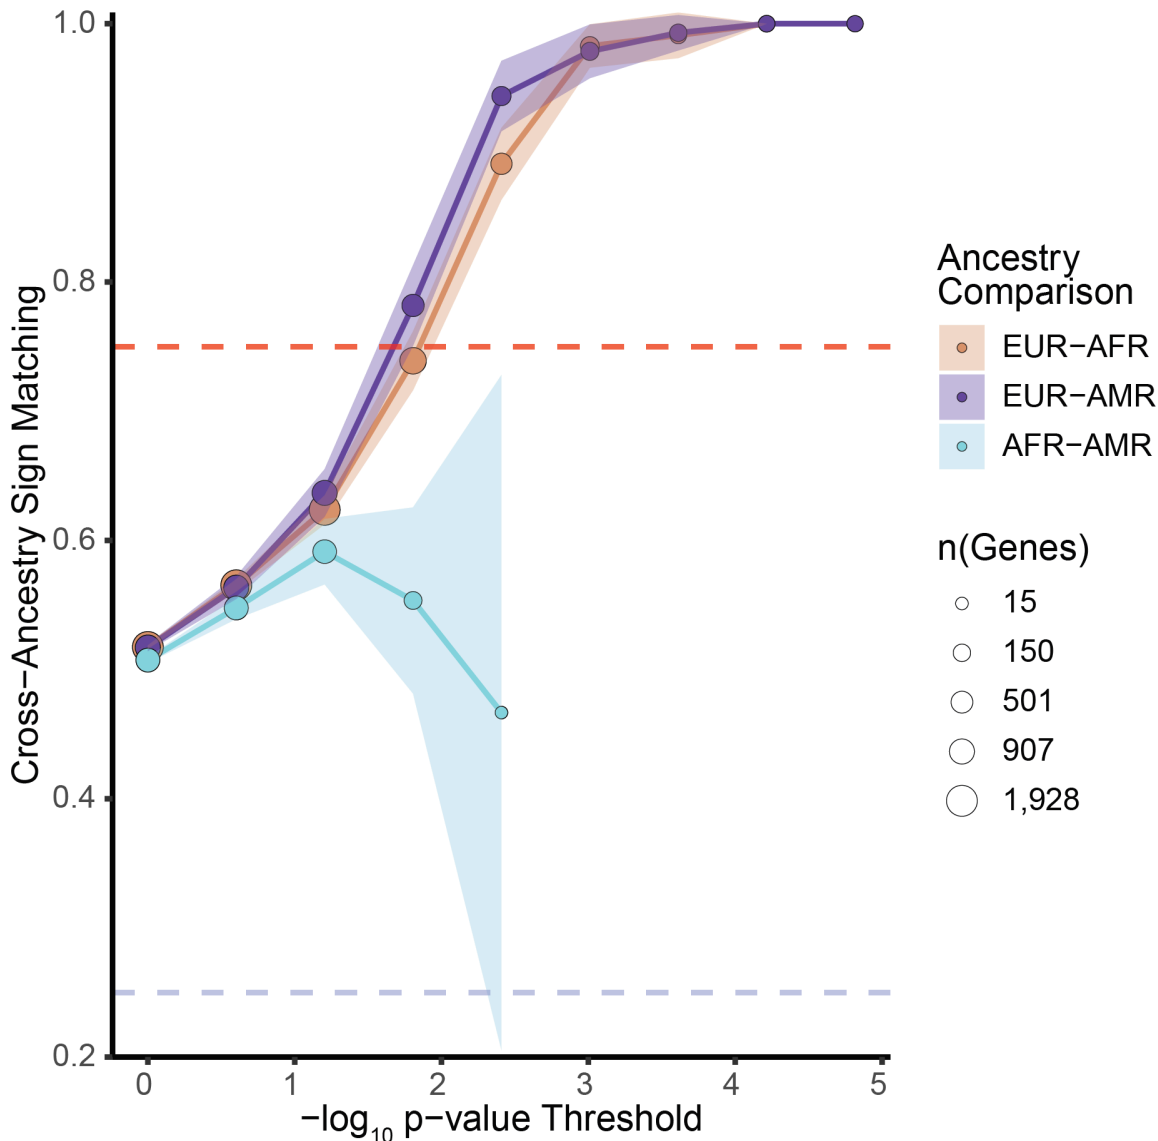

**Supplementary Fig. 15 | Conservation of cross-ancestry concordance of GReX-PheWAS associations among top trait-gene-cell-type combinations.** PheWAS was performed for all genes found to have a significant (Bonferroni-adjusted p-value  $\leq 0.05$ ) association in the I-snTWAS analysis spanning all snTIMs and ancestries (EUR, AFR and AMR). For each pairwise ancestry combination, trait-specific PheWAS associations were binned (x-axis) based on the maximum p-value of the shared gene-cell-type combinations ( $n=1,757$ , 880 and 681 in EUR-AFR, EUR-AMR, and AFR-AMR, respectively); only phecodes with at least 500 cases and 500 controls were considered. Consequently, the percentage of associations with concordant effect size signs for each ancestry pairwise combination is visualized among increasing p-value significance thresholds. Shaded region around each line represents the 95% confidence interval. Size of the point represents the number of gene-cell-type combinations at that threshold. To visualize a specific p-value threshold, we require a minimum number of observations corresponding to 2% of the applicable gene-cell-type combinations (36, 18 and 14 for EUR-AFR, EUR-AMR and AFR-AMR, respectively). Please note that we are underpowered for the AFR-AMR comparison.



## Supplementary Fig. 16

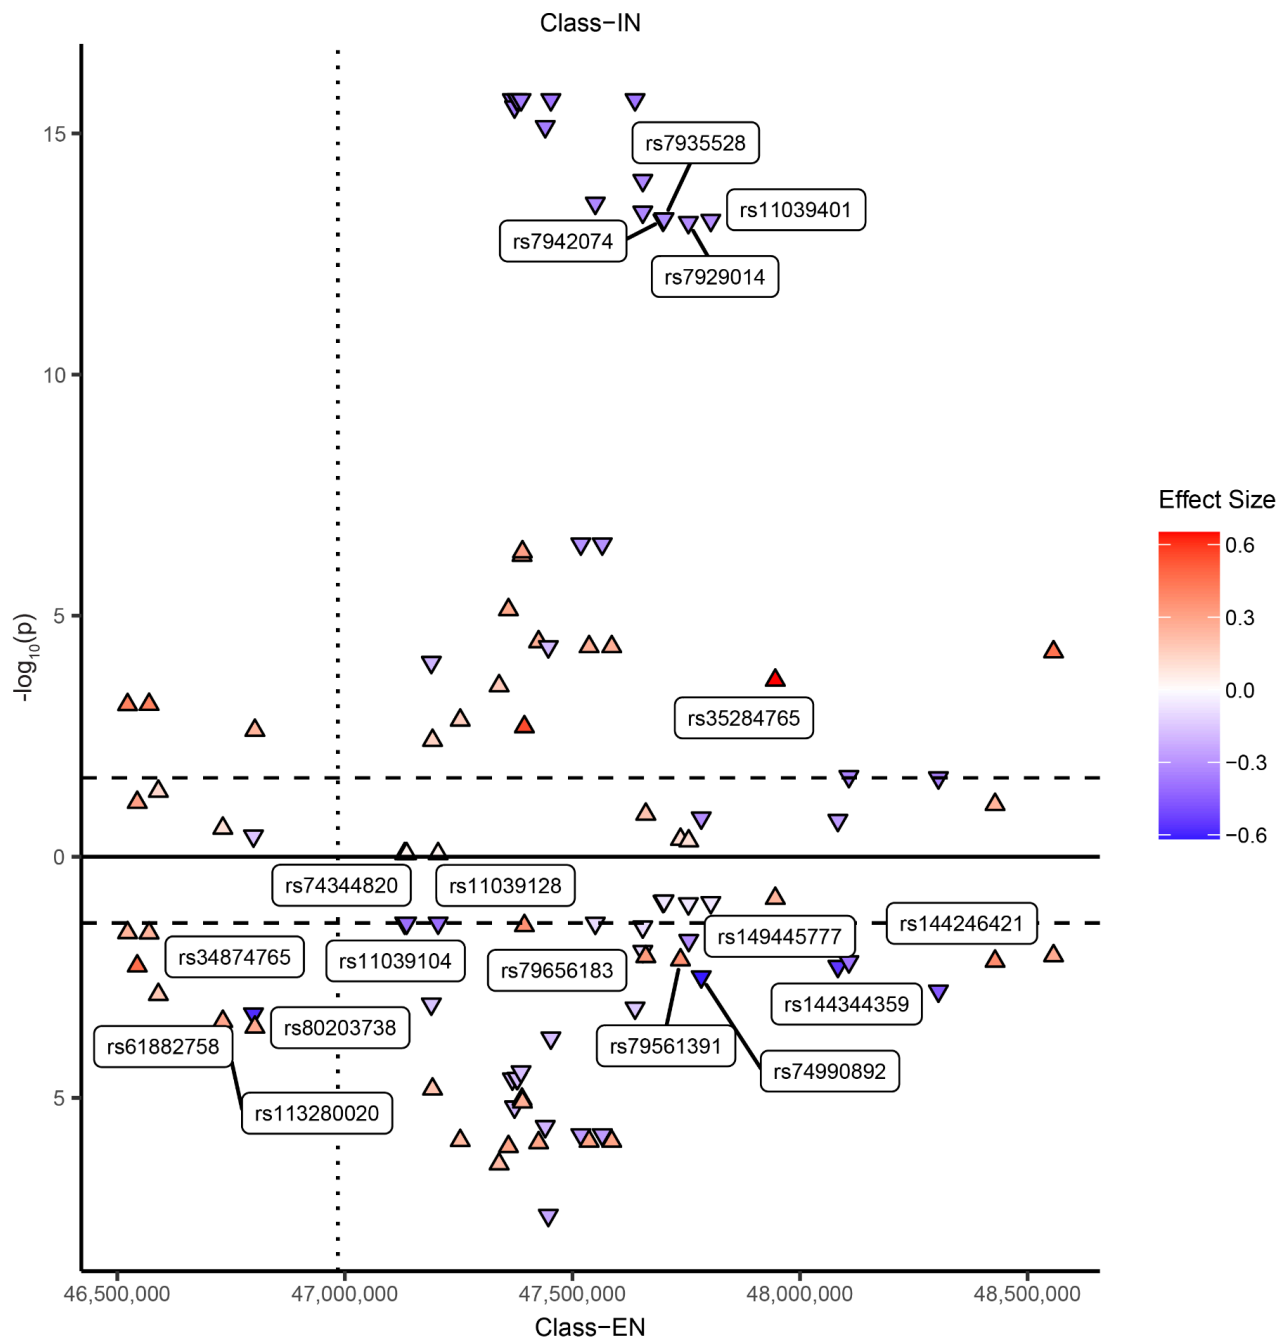

**Supplementary Fig. 16 | *CELF1* sn-eQTLs for inhibitory and excitatory neurons.** Sn-eQTLs for *CELF1* across 2 cell-types. Cell-types were chosen based on the differing association of cell-type specific *CELF1* GRex with various phenotypes. Labeled points indicate SNPs in which there is a significant ( $FDR^{33} \leq 0.05$ ; threshold for significance is indicated by horizontal dashed lines) effect in one cell-type but not the other. No SNPs contained significant effects in opposite directions for the two cell-types. Plotted SNPs were selected using a superset of SNP predictors in both *CELF1* snTIMs. Upward arrow indicates positive effect size and downward arrow indicates negative effect size. The vertical dotted line divides the LD blocks (utilizing EUR LD blocks as previously described<sup>113</sup>).

# Supplementary Fig. 17

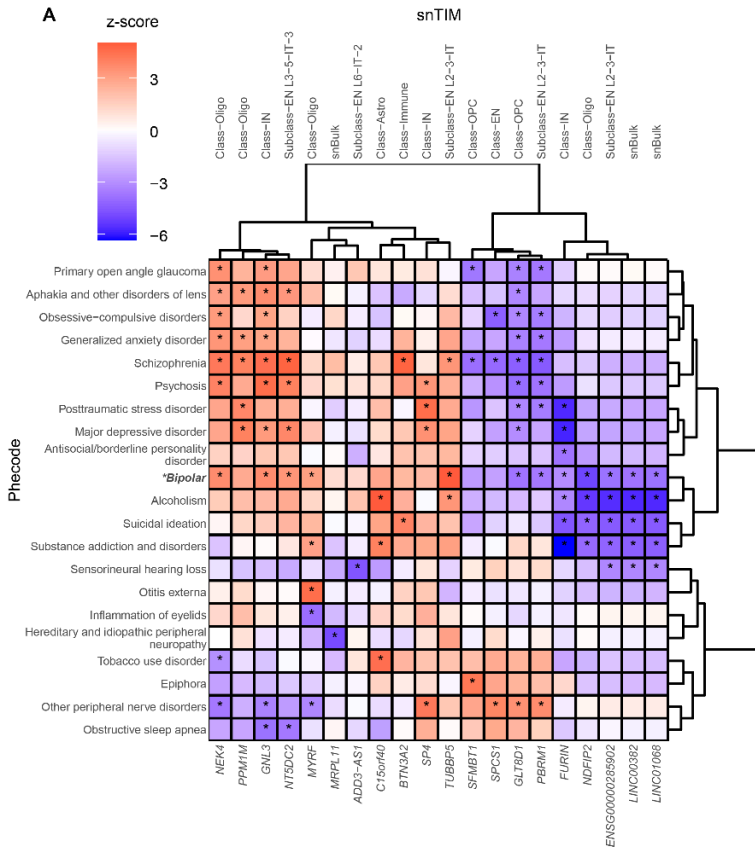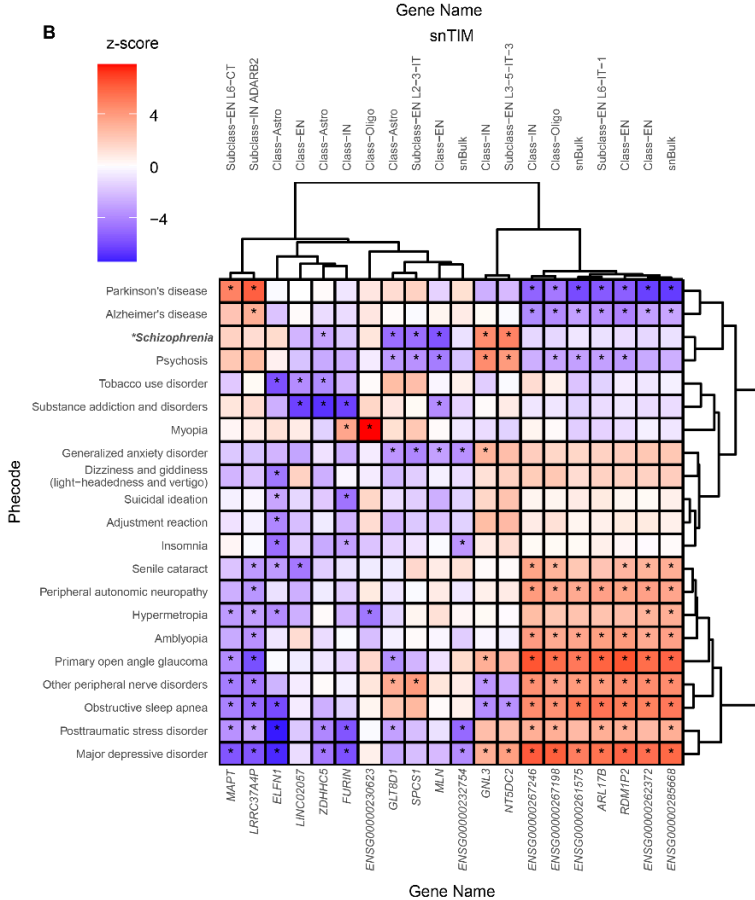

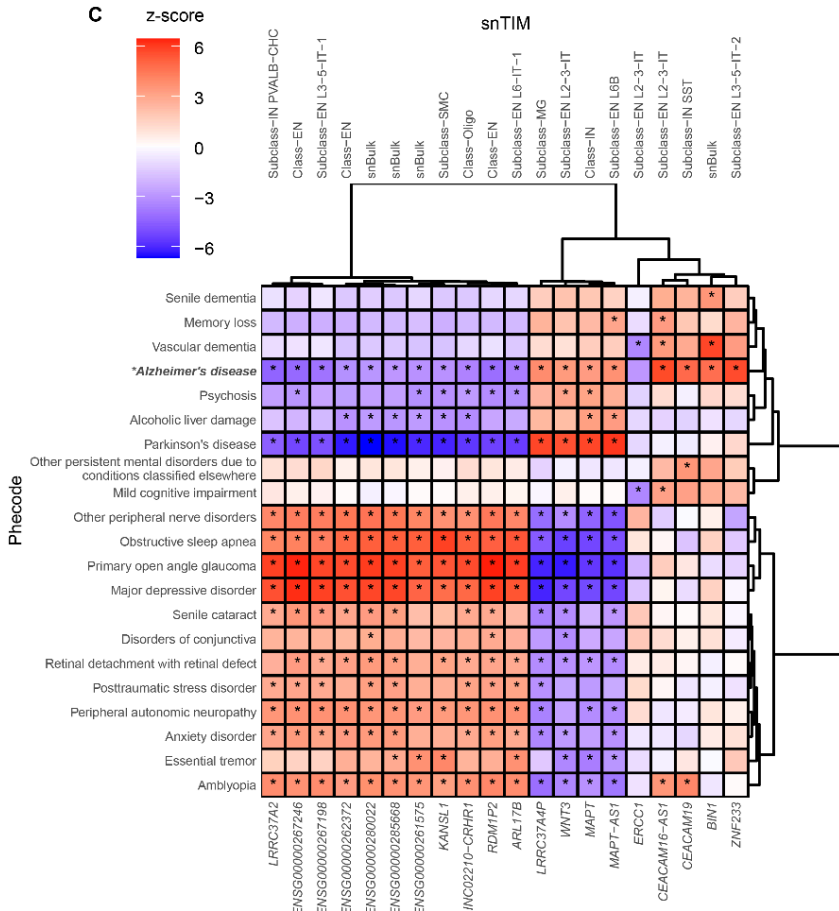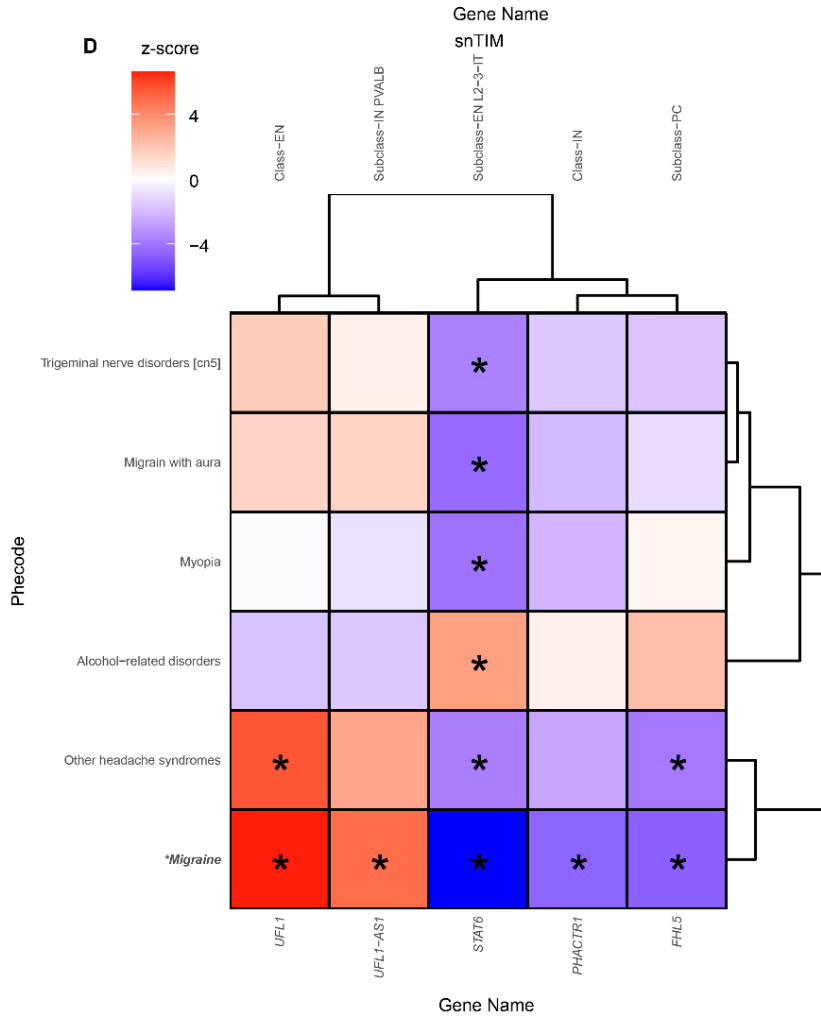



**Supplementary Fig. 17 | Clustering of top PheWAS associations in S-snTWAS.** PheWAS for the top 20 gene-cell-type combinations ranked from the S-snTWAS for each trait; each gene is represented by the cell-type with the lowest association p-value. In addition to each trait (mapped to the bolded italicized phecode), the top 20 (if at least 20 distinct phecodes are significant amongst the top 20 gene-cell-type combinations) phecodes among all phecode categories ranked by association p value are visualized. Ward's hierarchical agglomerative clustering was performed with Ward's criterion preservation. We describe the following traits in each panel: BD (***A***), SCZ (***B***), AD (***C***), Migraines (***D***), MDD (***E***), Insomnia (***F***). AUD is described within fig. 6C. ADHD, ALS, Anorexia, MS, and PD are excluded due to few cases in the MVP. PTSD and Anxiety are excluded due to few significant S-snTWAS associations.

Supplementary Fig. 18

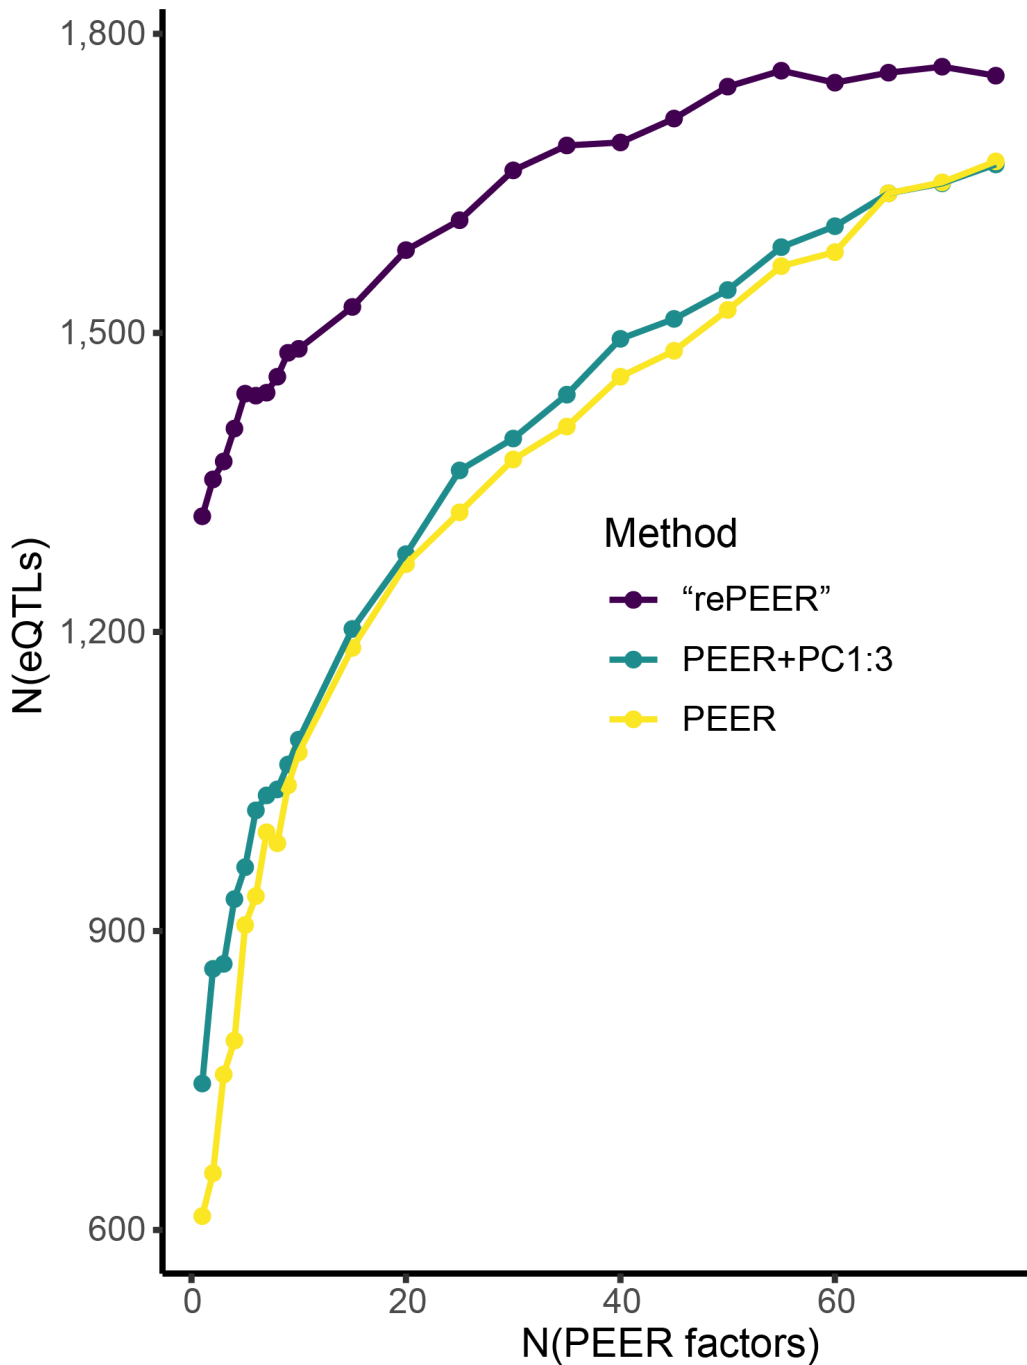

**Supplementary Fig. 18 | Comparison of batch effect correction methods.** To assess the impact of different batch effect correction methods on overall power, we utilized the FACS-MG cohort. "rePEER" refers to the method to perform PEER on each batch separately and again altogether after aggregation of all PEER-residualized expression data. "PEER" refers to the method to just perform PEER on all expression data aggregated across all batches. "PEER+PC1:3" refers to the method to perform PEER on all expression data aggregated across all batches with genotyping PCs 1, 2, and 3 supplied to the PEER algorithm. Each point represents the number of significant eQTLs

(FDR<sup>33</sup>-adjusted p-value  $\leq 0.05$ ) found at each selected number of PEER factors used in each method (using the second round of PEER for the “rePEER” method).

## Supplementary Fig. 19

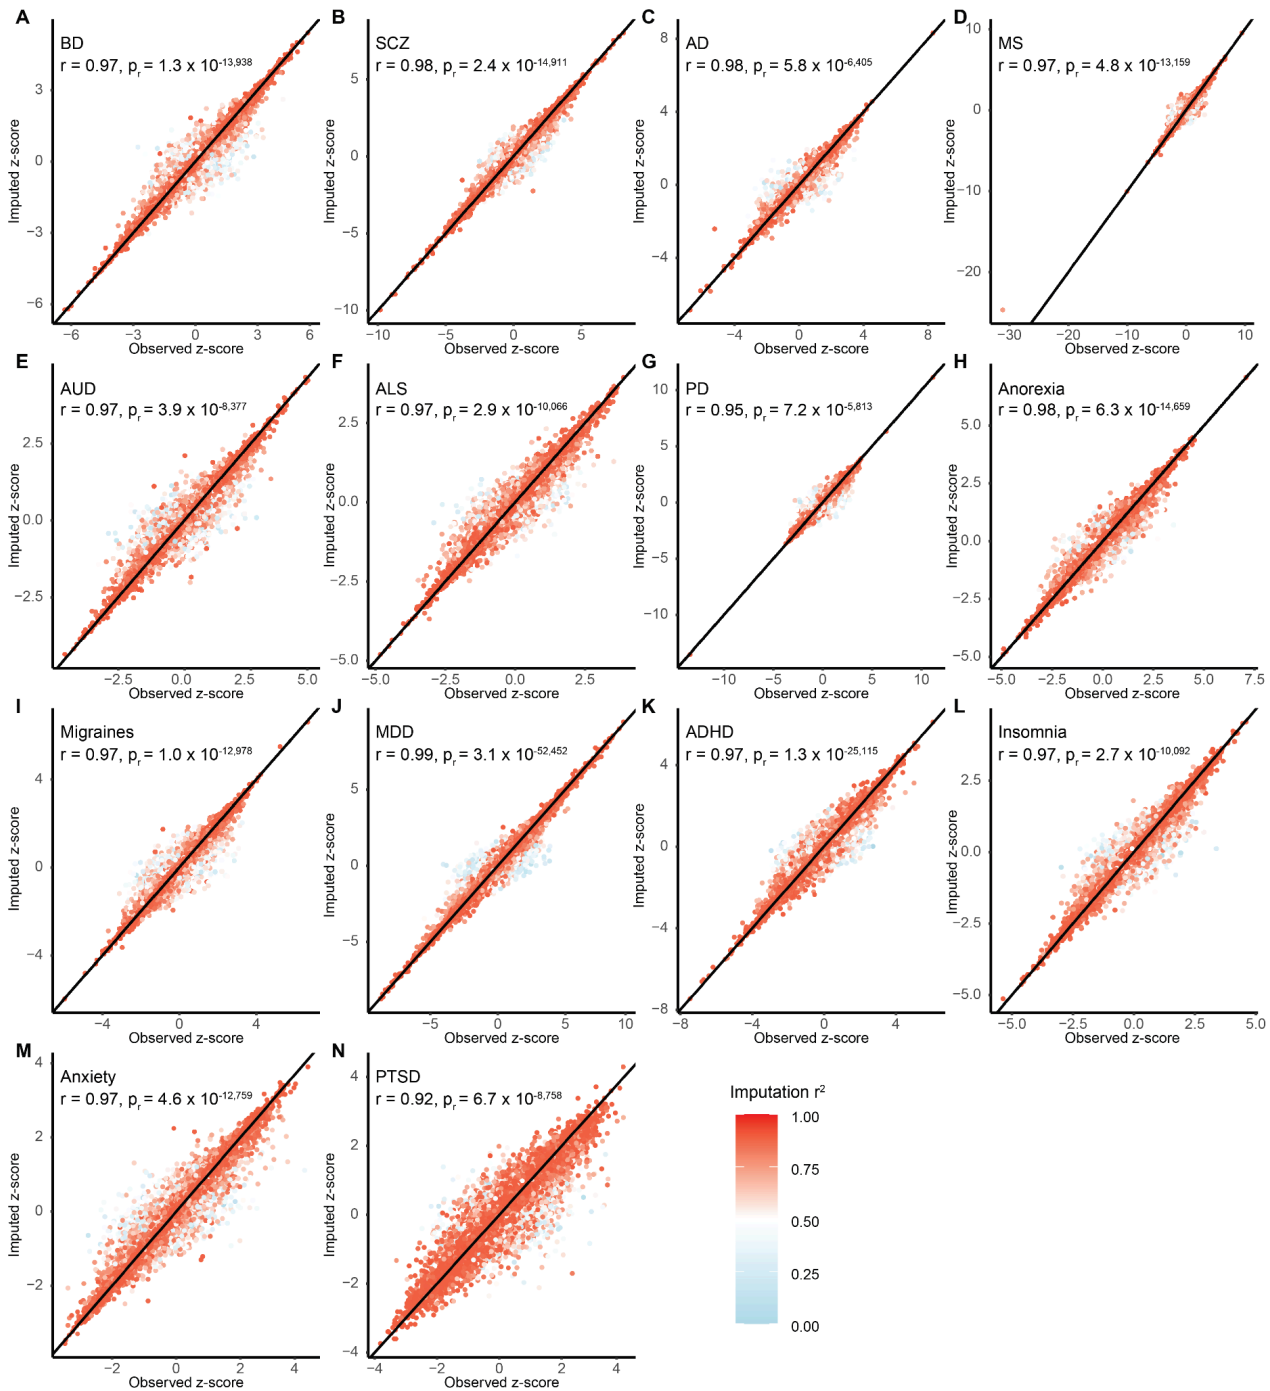

**Supplementary Fig. 19 | GWAS imputation accuracy.** We randomly selected SNPs for each GWAS (Table S17) (mean number of selected SNPs was 23,018 with a standard deviation of 14,334). For all selected SNPs, we performed GWAS imputation as if the SNP was missing so that we could observe the accuracy of GWAS imputation on missing data. GWAS imputation is described for each included trait: BD (A), SCZ (B), AD (C), MS (D), AUD (E), ALS (F), PD (G), Anorexia (H), Migraines (I), MDD (J), ADHD (K), Insomnia (L), Anxiety (M), PTSD (N). Every plot is annotated with the Pearson's correlation coefficient ( $r$ ) and  $p$ -value. Color of the point indicates the imputation  $r^2$ . Only missing SNPs with imputation  $r^2 \geq 0.7$  were retained for further analysis. Black diagonal line is a reference line with a slope of 1.



# SUPPLEMENTARY NOTES

## Other Acknowledgments

VA Million Veteran Program: Core Acknowledgements for Publications May 2024

### **MVP Program Office**

Sumitra Muralidhar, Ph.D., Program Director<sup>1</sup>

Jennifer Moser, Ph.D., Associate Director, Scientific Programs<sup>1</sup>

Jennifer E. Deen, B.S., Associate Director, Cohort & Public Relations<sup>1</sup>

### **MVP Executive Committee**

Co-Chair: Philip S. Tsao, Ph.D.<sup>2</sup>

Co-Chair: Sumitra Muralidhar, Ph.D.<sup>1</sup>

J. Michael Gaziano, M.D., M.P.H.<sup>3</sup>

Elizabeth Hauser, Ph.D.<sup>4</sup>

Amy Kilbourne, Ph.D., M.P.H.<sup>5</sup>

Michael Matheny, M.D., M.S., M.P.H.<sup>6</sup>

Dave Oslin, M.D.<sup>7</sup>

Deepak Voora, MD<sup>4</sup>

### **MVP Co-Principal Investigators**

J. Michael Gaziano, M.D., M.P.H.<sup>3</sup>

Philip S. Tsao, Ph.D.<sup>2</sup>

### **MVP Core Operations**

Jessica V. Brewer, M.P.H., Director, MVP Cohort Operations<sup>3</sup>

Mary T. Brophy M.D., M.P.H., Director, VA Central Biorepository<sup>3</sup>

Kelly Cho, M.P.H., Ph.D., Director, MVP Phenomics<sup>3</sup>

Lori Churby, B.S., Director, MVP Regulatory Affairs<sup>2</sup>

Scott L. DuVall, Ph.D., Director, VA Informatics and Computing Infrastructure (VINCI)<sup>8</sup>

Saiju Pyarajan Ph.D., Director, Data and Computational Sciences<sup>3</sup>

Robert Ringer, Pharm.D., Director, VA Albuquerque Central Biorepository<sup>9</sup>

Luis E. Selva, Ph.D., Director, MVP Biorepository Coordination<sup>3</sup>

Shahpoor (Alex) Shayan, M.S., Director, MVP PRE Informatics<sup>3</sup>

Brady Stephens, M.S., Principal Investigator, MVP Information Center<sup>10</sup>

Stacey B. Whitbourne, Ph.D., Director, MVP Cohort Development and Management<sup>3</sup>

### **MVP Publications and Presentations Committee**

Co-Chair: Themistocles L. Assimes, M.D., Ph. D<sup>2</sup>

Co-Chair: Adriana Hung, M.D.; M.P.H<sup>6</sup>

Co-Chair: Henry Kranzler, M.D.<sup>7</sup>

### **MVP Affiliations**

- 1: US Department of Veterans Affairs, 810 Vermont Avenue NW, Washington, DC 20420
- 2: VA Palo Alto Health Care System, 3801 Miranda Avenue, Palo Alto, CA 94304
- 3: VA Boston Healthcare System, 150 S. Huntington Avenue, Boston, MA 02130
- 4: Durham VA Medical Center, 508 Fulton Street, Durham, NC 27705
- 5: VA HSR&D, 2215 Fuller Road, Ann Arbor, MI 48105
- 6: VA Tennessee Valley Healthcare System, 1310 24th Ave. South, Nashville, TN 37212
- 7: Philadelphia VA Medical Center, 3900 Woodland Avenue, Philadelphia, PA 19104
- 8: VA Salt Lake City Health Care System, 500 Foothill Drive, Salt Lake City, UT 84148
- 9: New Mexico VA Health Care System, 1501 San Pedro Drive SE, Albuquerque, NM 87108
- 10: Canandaigua VA Medical Center, 400 Fort Hill Avenue, Canandaigua, NY 14424

### **PsychAD Acknowledgements**

#### **PsychAD Consortium Authors**

Aram Hong (1, 4, 6, 7); Athan Z. Li (10, 12); Biao Zeng (1, 4, 6, 7); Chenfeng He (9, 12); Chirag Gupta (9, 12); Christian Porras (1, 4, 6, 7); Clara Casey (1, 4, 6, 7); Colleen A. McClung (18); Collin Spencer (1, 4, 6, 7); Daifeng Wang (9, 10, 12); David A. Bennett (19); David Burstein (1, 2, 4, 6, 7, 8); Deepika Mathur (1, 4, 6, 7); Donghoon Lee (1, 4, 6, 7); Fotios Tsetsos (1, 2, 4, 6, 7); Gabriel E. Hoffman (1, 2, 4, 6, 7, 8); Genadi Ryan (13, 17); Georgios Voloudakis (1, 2, 3, 4, 6, 7, 8); Hui Yang (1, 4, 6, 7); Jaroslav Bendl (1, 4, 6, 7); Jerome J. Choi (11, 12); John F. Fullard (1, 4, 6, 7); Kalpana H. Arachchilage (9, 12); Karen Therrien (1, 4, 6, 7); Kiran Girdhar (1, 4, 6, 7); Lars J. Jensen (21); Lisa L. Barnes (19); Logan C. Dumitrescu (22, 23); Lyra Sheu (1, 4, 6, 7); Madeline R. Scott (18); Marcela Alvia (1, 4, 6, 7); Marios Anyfantakis (1, 4, 6, 7); Maxim Signaevsky (6, 7); Mikaela Koutrouli (1, 4, 6, 7, 21); Milos Pjanic (1, 4, 6, 7); Monika Ahirwar (13, 17); Nicolas Y. Masse (1, 4, 6, 7); Noah Cohen Kalafut (10, 12); Panos Roussos (1, 2, 4, 6, 7, 8); Pavan K. Auluck (20); Pavel Katsel (6); Pengfei Dong (1, 4, 6, 7); Pramod B. Chandrashekar (9, 12); Prashant N.M. (1, 4, 6, 7); Rachel Bercovitch (1, 4, 6, 7); Roman Kosoy (1, 4, 6, 7); Sanan Venkatesh (1, 2, 4, 6, 7); Saniya Khullar (9, 12); Sayali A. Alatkari (10, 12); Seon Kinrot (1, 4, 6, 7); Stathis Argyriou (1, 4, 6, 7); Stefano Marenco (20); Steven Finkbeiner (13, 14, 15, 16, 17); Steven P. Kleopoulos (1, 4, 6, 7); Tereza Clarence (1, 4, 6, 7); Timothy J. Hohman (22, 23); Ting Jin (9, 12); Vahram Haroutunian (5, 6, 7, 8); Vivek G. Ramaswamy (13, 17); Xiang Huang (12); Xinyi Wang (1, 4, 6, 7); Zhenyi Wu (1, 4, 6, 7); Zhiping Shao (1, 4, 6, 7)

#### **PsychAD Consortium Affiliations**

- 1: Center for Disease Neurogenomics, Icahn School of Medicine at Mount Sinai, New York, NY, USA
- 2: Center for Precision Medicine and Translational Therapeutics, James J. Peters VA Medical Center, Bronx, NY, USA
- 3: Department of Artificial Intelligence and Human Health, Icahn School of Medicine at Mount Sinai, New York, NY, USA
- 4: Department of Genetics and Genomic Sciences, Icahn School of Medicine at Mount Sinai, New York, NY, USA
- 5: Department of Neuroscience, Icahn School of Medicine at Mount Sinai, New York, NY, USA

- 6: Department of Psychiatry, Icahn School of Medicine at Mount Sinai, New York, NY, USA
- 7: Friedman Brain Institute, Icahn School of Medicine at Mount Sinai, New York, NY, USA
- 8: Mental Illness Research, Education and Clinical Center VISN2, James J. Peters VA Medical Center, Bronx, NY, USA
- 9: Department of Biostatistics and Medical Informatics, University of Wisconsin-Madison, Madison, WI, USA
- 10: Department of Computer Sciences, University of Wisconsin-Madison, Madison, WI, USA
- 11: Department of Population Health Sciences, University of Wisconsin-Madison, Madison, WI, USA
- 12: Waisman Center, University of Wisconsin-Madison, Madison, WI, USA
- 13: Center for Systems and Therapeutics, Gladstone Institutes, San Francisco, CA, USA
- 14: Department of Neurology, University of California San Francisco, San Francisco, CA, USA
- 15: Department of Physiology, University of California San Francisco, San Francisco, CA, USA
- 16: Neuroscience and Biomedical Sciences Graduate Programs, University of California San Francisco, San Francisco, CA, USA
- 17: Taube/Koret Center for Neurodegenerative Disease Research, Gladstone Institutes, San Francisco, CA, USA
- 18: Department of Psychiatry, University of Pittsburgh School of Medicine, Pittsburgh, PA, USA
- 19: Rush Alzheimer's Disease Center and Department of Neurological Sciences, Rush University Medical Center, Chicago, IL, USA
- 20: Human Brain Collection Core, National Institute of Mental Health-Intramural Research Program, Bethesda, MD, USA
- 21: Novo Nordisk Foundation Center for Protein Research, Faculty of Health and Medical Sciences, University of Copenhagen, Copenhagen, Denmark
- 22: Vanderbilt Genetics Institute, Vanderbilt University Medical Center, Nashville, TN, USA
- 23: Vanderbilt Memory & Alzheimer's Center, Vanderbilt University Medical Center, Nashville, TN, USA
